1 **RESEARCH ARTICLE**

2

3 ***Dynamic clustering of dynamin-amphiphysin rings regulates membrane constriction and***  
4 ***fission coupled with GTP hydrolysis***

5

6 Tetsuya Takeda<sup>1\*</sup>, Toshiya Kozai<sup>2</sup>, Huiran Yang<sup>1</sup>, Daiki Ishikuro<sup>2</sup>, Kaho Seyama<sup>1</sup>, Yusuke  
7 Kumagai<sup>2</sup>, Tadashi Abe<sup>1</sup>, Hiroshi Yamada<sup>1</sup>, Takayuki Uchihashi<sup>4</sup>, Toshio Ando<sup>3\*</sup>, Kohji Takei<sup>1\*</sup>

8

9 <sup>1</sup>Graduate School of Medicine, Dentistry and Pharmaceutical Sciences, Okayama University,  
10 Okayama, Japan; <sup>2</sup>Department of Physics, College of Science and Engineering, Kanazawa  
11 University, Kanazawa, Japan; <sup>3</sup>Bio-AFM Frontier Research Center, Institute of Science and  
12 Engineering, Kanazawa University, Kanazawa, Japan; <sup>4</sup>Department of Physics, School of  
13 Science, Nagoya University

14

15 \*For correspondence: ttakeda@okayama-u.ac.jp (T.T.), tando@staff.kanazawa-u.ac.jp (T.A.)  
16 and kohji@md.okayama-u.ac.jp (K.T.).

1 ***ABSTRACT***

2 Dynamin is a mechanochemical GTPase essential for membrane fission during clathrin  
3 mediated endocytosis. Dynamin forms washer ring-shaped/helical complexes at the neck of  
4 clathrin-coated pits and their structural changes coupled with GTP hydrolysis drive membrane  
5 fission. Dynamin and its binding protein amphiphysin cooperatively regulates membrane  
6 remodeling during fission, but its precise mechanism remains elusive. In this study, we analyze  
7 structural changes of dynamin-amphiphysin complexes during membrane fission using electron  
8 microscopy (EM) and high-speed atomic force microscopy (HS-AFM). Interestingly, HS-AFM  
9 analyses show that the dynamin-amphiphysin rings are rearranged to form clusters upon GTP  
10 hydrolysis and membrane constriction occurs at protein-uncoated regions flanking the clusters.  
11 We also show a novel function of amphiphysin in size control of the clusters to enhance  
12 biogenesis of endocytic vesicles. Our new approaches using combination of EM and HS-AFM  
13 clearly demonstrates dynamics of dynamin-amphiphysin complexes during membrane fission  
14 suggesting a novel “clusterase” model of dynamin-mediated membrane fission.

15

16

1 **INTRODUCTION**

2 Clathrin mediated endocytosis (CME) is the best characterized endocytic pathway by which  
3 cells incorporate extracellular molecules into cells with the aid of clathrin coat (Kirchhausen,  
4 Owen, & Harrison, 2014; McMahon & Boucrot, 2011). CME is required for various essential  
5 processes including neuronal transmission, signal transduction and other cell membrane activities  
6 such as cell adhesion and migration. For precise progression of membrane invagination and  
7 fission during CME, various proteins need to be assembled in a temporally and spatially  
8 coordinated manner at the site of endocytosis.

9 One of those endocytic proteins, dynamin, is a GTPase essential for membrane fission in CME  
10 (Antonny et al., 2016; Ferguson & De Camilli, 2012; Schmid & Frolov, 2011). There are three  
11 dynamin isoforms in mammals: dynamin 1 and dynamin 3, two tissue specific isoforms which are  
12 highly expressed in neurons, and dynamin 2, a ubiquitously expressed isoform (Cao, Garcia, &  
13 McNiven, 1998; T. Cook, Mesa, & Urrutia, 1996; T. A. Cook, Urrutia, & McNiven, 1994).  
14 Structural studies from several groups demonstrated that dynamin consists of five structurally  
15 distinct domains: a GTPase domain, a bundle signaling element (BSE), a stalk, a pleckstrin  
16 homology (PH) domain and proline-rich domain (PRD) from N-terminus to C-terminus (Faelber  
17 et al., 2011; Ford, Jenni, & Nunnari, 2011; Reubold et al., 2015). The GTPase domain is  
18 responsible for hydrolysis of GTP (guanosine triphosphate) and PH domain is required for  
19 membrane association by binding to negatively charged phospholipids such as PI (4,5) P<sub>2</sub>  
20 (phosphatidylinositol 4,5-bisphosphate). The stalk structure serves as a binding interface for  
21 dimerization and oligomerization of dynamin, and BSE, which is located between the stalk and  
22 GTPase domain, functions as a flexible hinge required for structural changes of dynamin upon  
23 GTP hydrolysis. Dynamin forms washer ring-like or helical oligomers which were first observed  
24 in presynaptic terminals of *shibire* mutant flies at restrictive temperature (Koenig & Ikeda, 1989).  
25 Dynamin also assembles into helices at the neck of endocytic pits in the isolated presynaptic  
26 nerve terminals treated with slowly-hydrolyzable GTP analogue GTP $\gamma$ S (guanosine  
27 5'-O-[gamma-thio]triphosphate) (Takei, McPherson, Schmid, & De Camilli, 1995). Similar  
28 dynamin rings/helix were reconstituted *in vitro* either with liposomes (Sweitzer & Hinshaw,  
29 1998; Takei et al., 1998) or without liposomes in a low salt condition (Hinshaw & Schmid, 1995).  
30 There is a consensus view about the dynamin-mediated membrane constriction and fission  
31 which is well supported by previous studies from different groups: membrane constriction is  
32 required, but not sufficient, for fission (Antonny et al., 2016; Faelber et al., 2012; Schmid &  
33 Frolov, 2011). However, it is still controversial how constriction is achieved, and what GTP

1 energy is used for. For example, membrane constriction could be achieved by assembly into the  
2 highly-constricted state when dynamin is bound to GTP (Chen, Zhang, Egelman, & Hinshaw,  
3 2004; Mattila et al., 2015; Mears, Ray, & Hinshaw, 2007; Zhang & Hinshaw, 2001).  
4 Alternatively, membrane constriction could be achieved by hydrolysis of GTP that induces a  
5 conformational change leading to constriction (Cocucci, Gaudin, & Kirchhausen, 2014; Marks et  
6 al., 2001; Roux, Uyhazi, Frost, & De Camilli, 2006). However, precise mechanisms involved in  
7 dynamin-mediated membrane constriction and fission remain unclear.

8 Amphiphysin is a BAR domain protein required for membrane invagination in CME (Wigge  
9 et al., 1997). Amphiphysin has a lipid interacting BAR (Bin-AMPH-Rvs) domain in its  
10 N-terminal, a medial clathrin/AP-2 binding (CLAP) domain and C-terminal Src homology 3  
11 (SH3) domain. The BAR domain of amphiphysin forms crescent-shaped dimer and its concave  
12 surface serves as a platform for bending membrane or sensing membrane curvature (Peter et al.,  
13 2004). The CLAP domain binds to clathrin and AP-2, major components of clathrin coated pits,  
14 and helps to recruit amphiphysin to the sites of CME. In addition, the C-terminal SH3 domain of  
15 amphiphysin binds directly to the PRD of dynamin 1 (David, McPherson, Mundigl, & de Camilli,  
16 1996; Takei, Slepnev, Haucke, & De Camilli, 1999) and enhances dynamin's GTPase activity in  
17 the presence of liposomes (Takei et al., 1999; Yoshida et al., 2004). Amphiphysin copolymerizes  
18 with dynamin 1 into washer ring-shaped complexes, which form membrane tubules *in vitro*  
19 (Takei et al., 1999; Yoshida et al., 2004) similar to those formed from synaptic plasma  
20 membranes (Takei et al., 1995). Furthermore, injection of specific antibodies against  
21 amphiphysin into the giant synapse in lampreys (Evergren et al., 2004) or amphiphysin KO in  
22 mice (Di Paolo et al., 2002) causes suppressed endocytosis in synaptic vesicle recycling. These  
23 results suggest that dynamin mediates membrane fission in CME in collaboration with  
24 amphiphysin *in vivo*. However, precise contribution of amphiphysin in the dynamin-mediated  
25 membrane fission remains elusive.

26 In this study, we analyze dynamics of dynamin-amphiphysin ring complexes using a novel  
27 approach combining EM and HS-AFM. Firstly, we show that the dynamin-amphiphysin rings  
28 are rearranged to form clusters upon GTP hydrolysis, and membrane constriction occurs at  
29 protein-uncoated regions between the clusters. Secondly, we reveal that GTP hydrolysis is  
30 required and sufficient for the cluster formation by dynamin-amphiphysin complexes by EM  
31 analyses. Finally, we show a novel function of amphiphysin in controlling cluster size, which in  
32 turn regulates biogenesis of endocytic vesicles. These findings provide new insights into the  
33 mechanism of membrane constriction and fission by dynamin-amphiphysin complexes.

1 **RESULTS**

2 ***GTP hydrolysis is required and sufficient for membrane constriction by dynamin-amphiphysin***  
3 ***complexes***

4 To elucidate the mechanisms of dynamin-mediated membrane fission, we reconstituted the  
5 minimum system *in vitro* and analyzed the time course of its structural changes using EM.  
6 Human dynamin 1 and amphiphysin were purified (Figure 1-figure supplement 1A) and their  
7 activity to form ring-shaped complexes in a buffer of physiological ionic strength and pH  
8 condition was confirmed (Figure 1-figure supplement 1B). As previously described (Sweitzer &  
9 Hinshaw, 1998; Takei et al., 1998; Takei et al., 1999), the dynamin-amphiphysin complexes  
10 induced tubulation of large unilamellar vesicles (LUVs) in the absence of GTP (Figure 1A, No  
11 GTP). Immediately after the addition of 1 mM GTP, the appearance of lipid tubules was not  
12 affected (Figure 1A, GTP 1 s), but they started to form multiple constriction sites over time  
13 (Figure 1A, GTP 5 s, 10 s and 30 s) and membrane fission occurred finally and numerous vesicles  
14 were generated within 1 min (Figure 1A, GTP 1 min).

15 Next, we tried to clarify how the membrane constriction and fission by dynamin-amphiphysin  
16 ring complexes are correlated with guanine nucleotide conditions during GTP hydrolysis. The  
17 appearance of lipid tubules (Figure 1B, No GTP) was not affected in the presence of either  
18 slowly-hydrolyzable GTP analogue GTP $\gamma$ S (Figure 1B, GTP $\gamma$ S) or non-hydrolyzable GTP  
19 analogue GMP-PNP (guanosine 5'-[ $\beta,\gamma$ -imido]triphosphate) (Figure 1B, GMP-PNP). In contrast,  
20 in the presence of GDP (guanosine diphosphate) and vanadate, the complex which mimics the  
21 GDP  $\cdot$  Pi transition state, lipid tubules were constricted at multiple sites (Figure 1B, GDP +  
22 vanadate). Addition of only GDP did not cause membrane constriction or fission, but membrane  
23 tubules were deformed (Figure 1B, GDP). Finally, numerous vesicles were generated 10 min after  
24 the addition of 1 mM GTP, in which multiple rounds of GTP hydrolysis were likely to have taken  
25 place (Figure 1B, GTP 10 min). Taken these results together, GTP hydrolysis is essential for both  
26 membrane constriction and fission by the dynamin-amphiphysin complexes, but subsequent  
27 dissociation of GTP hydrolytic products (GDP and/or phosphate) is required for completing  
28 membrane fission.

29

30 ***GTP hydrolysis induces clustering of dynamin-amphiphysin ring complexes***

31 Although we determined the requirement of GTP hydrolysis in membrane constriction and  
32 fission by the dynamin-amphiphysin complexes, structural changes of the complexes were not  
33 clearly resolved in the *in vitro* assay system using LUVs. To improve the resolution, we used

1 rigid lipid nanotubes containing glycolipid galactosylceramide (GalCer) (Wilson-Kubalek,  
2 Brown, Celia, & Milligan, 1998), instead of using LUVs in the *in vitro* assay system. Lipid  
3 nanotubes are rod-shaped liposomes and similar in size to the unconstricted necks of  
4 clathrin-coated pits observed *in vivo* (Figure 2A, Nanotube). Dynamin-amphiphysin complexes  
5 assembled into helices on the lipid nanotubes (Figure 2A, No GTP), which is similar to those  
6 formed by dynamin alone (Stowell, Marks, Wigge, & McMahon, 1999). Interestingly, the  
7 dynamin-amphiphysin rings transiently formed clusters after the addition of GTP (Figure 2A,  
8 GTP 1 s and 20 s, brackets). The dynamin-amphiphysin clusters were disorganized over time and  
9 partially dissociated from the nanotubes (Figure 2A, GTP 30 s and 1 min).

10 To correlate the dynamics of dynamin-amphiphysin complexes with GTP hydrolysis, we  
11 examined structural changes of the complexes on lipid nanotubes at different transition states of  
12 GTP hydrolysis. The appearance of dynamin-amphiphysin helices was unchanged even in the  
13 presence of GTP $\gamma$ S or GMP-PNP (Figure 2B, No GTP, GTP $\gamma$ S and GMP-PNP). Interestingly,  
14 addition of GDP and vanadate induced rearrangement of the dynamin-amphiphysin ring  
15 complexes to form clusters similar to those observed after the addition of GTP (Figure 2B, GDP +  
16 vanadate). The average pitch between washer-rings in the clusters were shorter ( $15.00 \text{ nm} \pm 2.2$ ,  
17 mean pitch  $\pm$  s.e.m.) compared to the average pitch of the ring complexes in No GTP control  
18 ( $19.96 \text{ nm} \pm 0.47$ , mean pitch  $\pm$  s.e.m.). In contrast, GDP alone did not affect the distribution of  
19 dynamin-amphiphysin rings (Figure 2B, GDP). Finally, the dynamin-amphiphysin ring  
20 complexes were disorganized and eventually dissociated from the lipid nanotubes 10 min after  
21 the addition of 1 mM GTP (Figure 2B, GTP 10 min). Taken these results together, the  
22 dynamin-amphiphysin ring complexes transiently form clusters in the GTP hydrolysis transition  
23 state of GDP  $\cdot$  Pi during which membrane tubules are constricted.

24

### 25 ***HS-AFM revealed dynamic clustering of dynamin-amphiphysin ring complexes upon GTP*** 26 ***hydrolysis***

27 To elucidate the dynamics of dynamin-amphiphysin ring complexes during the membrane  
28 constriction and fission, we analyzed the clustering process of the complexes using HS-AFM  
29 (Ando, Uchihashi, & Kodera, 2013). LUVs were stably immobilized on the carbon-coated and  
30 glow-discharged mica substrate (Figure 3-figure supplement 1A; Supplementary Movie S1), and  
31 they were successfully tubulated in the presence of dynamin and amphiphysin (Figure 3-figure  
32 supplement 1B; Supplementary Movie S2). The dynamin-amphiphysin rings on the lipid tubules  
33 were aligned with an almost regular pitch ( $22.04 \text{ nm} \pm 0.68$ , mean pitch  $\pm$  s.e.m.) and they were

1 immobile before GTP addition (Figure 3A, 0 s and 21 s; Supplementary Movie S3). Interestingly,  
2 the dynamin-amphiphysin rings became mobile after GTP addition and eventually formed  
3 clusters consisting of a few rings with shorter pitch ( $15.72 \text{ nm} \pm 0.30$ , mean pitch  $\pm$  s.e.m.) (Figure  
4 3A, from 42 s to 131 s; Supplementary Movie S3). Particle tracking analyses of the individual  
5 dynamin-amphiphysin rings showed that the dynamin-amphiphysin complexes were static before  
6 GTP addition (Figure 3B, 5-21 sec; Supplementary Movie S4), but addition of 1mM GTP  
7 stimulated longitudinal movement of the ring complexes, leading to the cluster formation (Figure  
8 3B, 38-54 sec, 38-86 sec and 38-118 sec; Supplementary Movie S5). Although membrane fission  
9 was not observed in this sample probably due to a strong attachment of the lipid tubule to the  
10 substrate, the rings had a tendency to constrict during cluster formation (Figure 3C; Figure  
11 3-figure supplement 2). These results suggest that dynamin-amphiphysin ring complexes undergo  
12 two modes of structural changes, longitudinal clustering and radial constriction, during GTP  
13 hydrolysis.

14

#### 15 ***Membrane fission occurs at protein-uncoated regions flanking dynamin-amphiphysin clusters***

16 We next tried to correlate the cluster formation of dynamin-amphiphysin ring complexes with  
17 membrane constriction and fission. In the representative sample in which membrane constriction  
18 and fission occurred, a few dynamin-amphiphysin rings merged to form a cluster over time after  
19 GTP addition (Figure 4A, 0 s, 125.3 s, 185.5 s and 227.5 s; Supplementary Movie S6).  
20 Interestingly, membrane constriction occurred at flanking regions of the cluster where membrane  
21 was bare of dynamin-amphiphysin complexes (Figure 4A, fission point (FP).1 and FP.2). The  
22 heights at sites marked with FP.1 and FP.2 were not changed before constriction (Figure 4B,  
23 before constriction), but they became lower in a stepwise manner from a pre-constriction height  
24 of around 30 nm down to 20-25 nm or below (Figure 4B, after constriction). Similar  
25 longitudinal redistribution of the dynamin-amphiphysin rings before membrane constriction was  
26 also observed in another sample, in which constriction occurred at one end of clustered  
27 dynamin-amphiphysin complexes (Figure.4c, arrow; Supplementary Movie S8). These results  
28 strongly suggest that membrane constriction and fission occur at the protein-uncoated regions  
29 created as a result of the clustering of dynamin-amphiphysin ring complexes.

30

#### 31 ***Amphiphysin contributes to efficient vesicle formation by controlling cluster formation***

32 We previously demonstrated that amphiphysin stimulates the GTPase activity of dynamin and  
33 thus enhances vesicle biogenesis (Yoshida et al., 2004). In this study, we also noticed that the

1 average size of vesicles formed by dynamin-amphiphysin complexes ( $69.99 \pm 2.93$  nm, mean  
2 diameter  $\pm$  s.e.m.) was significantly smaller compared to those formed by dynamin alone ( $204.58$   
3  $\pm 12.25$  nm, mean diameter  $\pm$  s.e.m.) after GTP addition (Figure 5A). Consistently,  
4 dynamin-amphiphysin complex formed constriction sites with shorter intervals ( $150.28 \pm 9.75$   
5 nm, mean intervals  $\pm$  s.e.m.) compared to those formed by dynamin alone ( $193.49 \pm 15.82$  nm,  
6 mean intervals  $\pm$  s.e.m.) in the presence of GDP and vanadate (Figure 5B). To further elucidate  
7 roles of amphiphysin in the membrane constriction and fission, the cluster formation by dynamin  
8 alone was compared to that by dynamin-amphiphysin complexes, using lipid nanotubes. As  
9 already described, dynamin-amphiphysin complexes formed clusters with a few rings in the  
10 presence of GDP and vanadate ( $34.22 \pm 1.66$  nm, mean cluster size  $\pm$  s.e.m.) (Figure 5C,  
11 Dynamin + Amphiphysin). In contrast, dynamin alone formed larger-sized clusters consist of  
12 more ring complexes ( $59.27 \pm 4.69$  nm, mean cluster size  $\pm$  s.e.m.) (Figure 5C, Dynamin). These  
13 results suggest that amphiphysin contributes to the effective generation of properly sized vesicles  
14 by controlling the cluster formation of dynamin-amphiphysin ring complexes.  
15



## 1 **DISCUSSION**

2 In this study, we analyzed dynamics of dynamin-amphiphysin ring complexes during  
3 membrane constriction and fission using EM and HS-AFM. EM analyses showed that GTP  
4 hydrolysis is required for both membrane constriction and fission, but dissociation of hydrolytic  
5 products (GDP and/or phosphate) seems necessary for the completion of membrane fission  
6 (Figure 1). In the presence of GTP or GDP and vanadate, dynamin-amphiphysin ring complexes  
7 are reorganized, resulting in the formation of clusters consisting of a few dynamin-amphiphysin  
8 rings (Figure 2). HS-AFM analyses directly demonstrated that GTP hydrolysis induces dynamic  
9 longitudinal movement of the dynamin-amphiphysin rings as well as constriction during cluster  
10 formation (Figure 3). Interestingly, HS-AFM analyses also demonstrated that membrane  
11 constriction and fission occur at the “protein-uncoated” regions created as a result of cluster  
12 formation of dynamin-amphiphysin complexes (Figure 4). Finally, we found that amphiphysin  
13 contributes to effective biogenesis of endocytic vesicles by regulating size of the clusters formed  
14 by dynamin-amphiphysin ring complexes (Figure 5).

15 There is a consensus view about the requirement of GTP hydrolysis in membrane fission, but  
16 the requirement of GTP hydrolysis in membrane constriction is still controversial (Antonny et al.,  
17 2016). Membrane tubules are constricted in the presence of non-hydrolyzable GTP analogue  
18 (Chen et al., 2004; Mears et al., 2007; Zhang & Hinshaw, 2001) and more constricted with a  
19 GTP-loaded GTPase defective K44A mutant (Sundborger et al., 2014). In both cases,  
20 membrane tubules are evenly constricted and periodical membrane constriction sites which lead  
21 to membrane fission is not created. In the present study, we showed that membrane constriction  
22 sites are created in the presence of GDP and vanadate, which mimicked a transition state of  
23 GTP hydrolysis (GDP · Pi), suggesting that complete hydrolysis of GTP is required for the  
24 formation of constriction sites leading to membrane fission (Figure 1B). Membrane fission has  
25 never been observed in the presence of GDP and vanadate, suggesting that release of GTP  
26 hydrolytic products (GDP and/or phosphate) is a prerequisite for membrane fission. Further  
27 analyses will more precisely reveal which intermediate state in the GTPase reaction is  
28 responsible for the membrane fission or how many GTPase cycles are required for it.

29 In this study, we revealed that dynamin-amphiphysin ring complexes are rearranged to form  
30 their clusters upon GTP hydrolysis (Figure 2 and Figure 3) and membrane fission occurs at the  
31 flanking “protein-uncoated” membrane regions (Figure 4). In the “constrictase” model, dynamin  
32 constricts membrane until the membrane neck reaches to the hemi-fission state, which leads to  
33 spontaneous membrane fission (Chen et al., 2004; Hinshaw & Schmid, 1995; Mears et al., 2007).

1 However, several lines of evidences are apparently inconsistent with this simple model. For  
2 instance, the super-constricted state of dynamin does not constrict the membrane sufficiently  
3 enough to reach the hemi-fission state (Sundborger et al., 2014) and membrane tension and/or  
4 torsion is required to overcome the energy barrier to fission (Bashkirov et al., 2008; Morlot et  
5 al., 2012; Roux et al., 2006). Based on these results and our results in this study, we propose a  
6 novel model of membrane fission by dynamin-amphiphysin complexes, for which we term  
7 “clusterase” model (Figure 6). First, dynamin-amphiphysin are assembled to form washer  
8 ring-like or helical polymers to induce membrane tubulation (Figure 6A). GTP hydrolysis  
9 induces dynamic longitudinal rearrangement of dynamin-amphiphysin rings to form clusters  
10 (Figure 6B). The clustered dynamin-amphiphysin rings also constrict to give local tension  
11 and/or torsion to the membrane tube at the edge of the clusters (Figure 6C). Alternatively, the  
12 dynamin-amphiphysin clusters may serve as a lipid diffusion barrier that causes friction leading  
13 to membrane scission (Simunovic et al., 2017). Finally, membrane fission occurs along with  
14 disassembly of the dynamin-amphiphysin polymers into oligomers (Figure 6D). Longitudinal  
15 rearrangement upon GTP hydrolysis similar to the cluster formation by the  
16 dynamin-amphiphysin complexes was also observed in an EM study on the dynamics of  
17 dynamin with lipid nanotubes (Stowell et al., 1999) and more recently by HS-AFM analyses on  
18 dynamics of  $\Delta$ PRD dynamin (Colom, Redondo-Morata, Chiaruttini, Roux, & Scheuring, 2017),  
19 suggesting that the longitudinal rearrangement is an intrinsic property of dynamin during  
20 membrane fission.

21 We revealed that amphiphysin possibly contributes to effective vesicle biogenesis by  
22 controlling the number of constriction sites in a long membrane tubule formed *in vitro* (Figure  
23 5). Tubular structures have long been known to be present in various synapses, and they are  
24 described as “membrane tubules” (J. Heuser & Miledi, 1971), “cisternae” (J. E. Heuser &  
25 Reese, 1973), “synaptic tubules” (Samorajski, Ordy, & Keefe, 1966) or “anastomosing tubules”  
26 (Ekstrom von Lubitz, 1981). The tubules are enriched in endocytic proteins including dynamin,  
27 synaptojanin, amphiphysin, and endophilin (Fuchs, Brandstatter, & Regus-Leidig, 2014; Takei  
28 et al., 1998), and the presence of the tubules becomes more prominent when synapses are  
29 stimulated (Fuchs et al., 2014; Takei et al., 1998), or when membrane fission is blocked in  
30 dynamin 1 K.O. mice (Ferguson et al., 2007). These findings strongly suggest that the tubular  
31 structures represent endocytic intermediate at which dynamin-amphiphysin-dependent synergic  
32 vesicle formation takes place in the synapse. Besides amphiphysin, other BAR domain proteins,  
33 endophilin and syndapin, are also implicated in synaptic vesicle recycling (Dittman & Ryan,

1 2009; Koch et al., 2011; Milosevic et al., 2011). One of the important future goals of dynamin  
2 study would be to clarify regulatory mechanisms by which dynamin alters its interactions with  
3 various BAR proteins during synaptic vesicle recycling process.

4 In conclusion, live imaging analyses using HS-AFM in this study and a study from another  
5 group (Colom et al., 2017) gave new mechanistic insights into the dynamin-mediated membrane  
6 fission. Combinatory approaches using high temporal resolution imaging with HS-AFM and  
7 high spatial resolution structural analyses with X-ray crystallography or Cryo-EM will be the  
8 most powerful approach in resolving various dynamic membrane remodeling processes in the  
9 future.

1 **MATERIALS AND METHODS**

2 ***Purification of dynamin1 and amphiphysin***

3 Human dynamin1 was purified using the method of Warnock et al with some modification  
4 (Warnock, Hinshaw, & Schmid, 1996). Sf9 cells grown in 600 ml of SF-900II SFM (Life  
5 Technologies) to the cell density of  $1 \times 10^6$  cells/ml and the cells were infected with  
6 baculoviruses expressing dynamin1. After cultivation of cells at 28 °C for 69 hours, the infected  
7 Sf9 cells were harvested by centrifugation at  $500 \times g$  for 10 min. The cell pellet was  
8 resuspended by 1/20 of the culture volume (30 ml) of HCB (Hepes column buffer)100 (20 mM  
9 Hepes, 100 mM NaCl, 2 mM EGTA, 1 mM MgCl<sub>2</sub>, 1 mM DTT, 1 mM PMSF, 1 µg/ml  
10 Pepstatin A, 40 µM ALLN, pH 7.2) and cells were sonicated using a sonicator  
11 (Advanced-Digital SONIFIER model 250, BRANSON). The cell lysate was mixed with equal  
12 volume of HCB0 (20 mM Hepes, 2 mM EGTA, 1 mM MgCl<sub>2</sub>, 1 mM DTT, 1 mM PMSF, 1  
13 µg/ml Pepstatin A, 40 µM ALLN, pH 7.2) to make HCB50 (20 mM Hepes, 50 mM NaCl, 2  
14 mM EGTA, 1 mM MgCl<sub>2</sub>, 1 mM DTT, 1 mM PMSF, 1 µg/ml Pepstatin A, 40 µM ALLN,  
15 pH7.2) and centrifuged at  $210,000 \times g$  for 1h at 4°C. Ammonium sulfate was added to the  
16 cleared lysate to the 30% saturation and incubated at 4°C for 30min and centrifuged at  $10,000 \times$   
17 g for 10min to recover the dynamin1 containing fraction in the pellet. The dynamin1 pellet was  
18 resuspended with 20 ml of HCB50 and dialyzed against 2L of HCB50 for total 4 hours (2 hours,  
19 2 times) using dialysis membrane (Spectra/Por<sup>®</sup> Dialysis Membrane MWCO: 3500). The  
20 dialyzed dynamin1 fraction was applied to Mono Q5/50GL column (GE healthcare) and bound  
21 proteins were eluted stepwise using HCB50, HCB100, HCB250 and HCB1000 buffers. Purified  
22 dynamin1 was recovered in HCB250 fraction and purity was determined by SDS-PAGE (Figure  
23 1-figure supplement 1A, Dynamin).

24 Human amphiphysin was purified following manufacture's instruction (GE Healthcare) with  
25 slight modifications. Host bacteria BL21 (DE3) transformed with an expression construct for  
26 GST fusions of human amphiphysin (pGEX6P2-HsAMPH) were grown in 1 L of LB medium  
27 to the cell density of 0.6-0.8 (OD 600 nm) at 37 °C and then protein expression was induced at  
28 18 °C for 12 hours in the presence of 0.1 mM IPTG. The bacterial cells were harvested by  
29 centrifugation at  $7,000 \times g$  for 10 min and cell pellet was resuspended by 1/10 culture volume  
30 (100 ml) of Elution/Wash 300 buffer (50 mM Tris-HCl, pH 8.0, 300 mM NaCl). The  
31 resuspended cells were sonicated using Advanced-Digital SONIFIER model 250D (Branson)  
32 and centrifuged at  $261,000 \times g$  for 30 min at 4 °C and cleared lysate was recovered in  
33 supernatant. To the cleared lysate, 1/100 culture volume (1 ml in bed volume) of Glutathione

1 Sepharose 4B Beads (GE Healthcare) was added and they are mixed using rotating mixer for 1h  
2 at 4°C. The beads were washed with the Elution/Wash 300 buffer for 5 times in a repeated cycle  
3 of centrifugation at  $420 \times g$  for 5 min at 4 °C followed by mixing with rotator for 5 min at 4°C.  
4 The beads with purified GST fusions of amphiphysin were equilibrated with PreScission Buffer  
5 (50 mM Tris-HCl, 150 mM NaCl, 1 mM EDTA, 1 mM DTT, pH 7.0) and GST-tag was  
6 removed by PreScission Protease (GE Healthcare) by incubating for 12 h at 4 °C. The purified  
7 amphiphysin was recovered by centrifuge ( $12,000 \times g$ , 5 min at 4 °C) using spin column  
8 (Ultrafree-Mc, GV 0.22  $\mu\text{m}$ , Millipore) and purity was determined by SDS-PAGE (Figure  
9 1-figure supplement 1A, Amphiphysin).

10

### 11 ***Preparation of LUVs and lipid nanotubes***

12 Large unilamellar vesicles (LUVs) and lipid nanotubes were prepared as previously described  
13 (Takei, Slepnev, & De Camilli, 2001). For LUVs, 70% PS (Cat. No 840032C, Avanti), 10%  
14 biotinPE (Avanti) and 10 % cholesterol (Avanti) were mixed and, for lipid nanotubes 40% NFA  
15 Galactocerebrosides (Sigma C1516), 40% PC (Avanti), 10% PI(4,5)P<sub>2</sub> (Calbiochem) and 10%  
16 cholesterol (Avanti) were mixed in 250  $\mu\text{l}$  of chloroform in a glass vial (Mighty Vial No.01 4 ml,  
17 Maruemu Cat. No 5-115-03). Then chloroform was evaporated using slow-flow nitrogen gas to  
18 produce lipid a lipid film on the glass and then completely dried in a vacuum desiccator for  
19 30min. The dried lipid was rehydrated by water-saturated nitrogen gas followed by addition of  
20 250  $\mu\text{l}$  of filtered 0.3M sucrose for 2h at 37 °C. The resultant LUVs and lipid nanotubes were  
21 passed through 0.4  $\mu\text{m}$ - and 0.2  $\mu\text{m}$ - polycarbonate filters respectively 11 times using Avanti  
22 Mini extruder. The LUVs and lipid nanotubes (1 mg/ml of final concentration) were stored in  
23 dark at 4 °C avoiding photooxidation.

24

### 25 ***EM imaging of in vitro assay with liposomes and dynamin-amphiphysin complexes***

26 LUVs and lipid nanotubes were diluted to 0.17 mg/ml in cytosolic buffer (25 mM  
27 Hepes-KOH, pH 7.2, 25 mM KCl, 2.5 mM Magnesium acetate, 0.1 M K-glutamate, pH 7.4).  
28 Dynamin-amphiphysin complexes (1:1 in molar ratio) were diluted to 0.6  $\mu\text{M}$  in the cytosolic  
29 buffer. Formvar filmed EM grids were carbon-coated, then glow-discharged. Droplets of the  
30 diluted lipids (10 $\mu\text{l}$  each) were prepared on Parafilm and adsorbed on EM grids for 5 min at  
31 room temperature. Then the EM grids with lipids were transferred to other droplets of the  
32 diluted dynamin-amphiphysin complexes and incubated for 30 min at room temperature in a  
33 humid chamber. To see the temporal effect of GTP hydrolysis, the EM grids were transferred to

1 1mM of GTP and incubated for various time periods (from 1s to 10 min) at room temperature.  
2 Alternatively, the EM grids were incubated either GTP, GTP $\gamma$ S, GMP-PNP, GDP plus  
3 Vanadate and GDP to analyze GTP hydrolysis transition state structures. The EM grids were  
4 negatively stained with filtered 2% uranyl acetate and observed with transmission electron  
5 microscope (HITACHI H-7650).

6

### 7 ***HS-AFM imaging***

8 All AFM images shown in this article were capture by a laboratory-built HS-AFM in which  
9 the amplitude-modulation mode was used. For the HS-AFM imaging, a small cantilever with  
10 dimensions of 7- $\mu$ m long, 2- $\mu$ m wide, and 90-nm thick was used (Olympus). Its nominal spring  
11 constant and resonant frequency were  $\sim$ 0.1 N/m and  $\sim$ 800 kHz in an aqueous solution,  
12 respectively. To obtain a sharp tip, an amorphous carbon pillar was grown on the original  
13 bird-beak tip of the cantilever by electron beam deposition (EBD) and then sharpened by a  
14 plasma etching in an argon environment. The typical radius of the EBD tip was approximately 2  
15 nm after sharpening. For the amplitude-modulation imaging, the cantilever was oscillated with  
16 amplitude less than 10 nm under free oscillation condition and the set-point was set at  $\sim$ 90% of  
17 the free oscillation amplitude. For HS-AFM imaging of liposomes and dynamin-amphiphysin  
18 complexes with lipid tubules or nanotubes, we used mica covered with carbon film. After  
19 coating a freshly cleaved mica surface with carbon film, hydrophilic treatment was carried out  
20 by a grow discharge. The liposomes (0.17 mg/ml) were deposited on the hydrophilic mica  
21 surface and incubated for 5 min at room temperature followed by deposition of proteins (0.6  $\mu$ M  
22 of dynamin1 and amphiphysin) for 30 min at room temperature. After the incubation, the  
23 sample was thoroughly washed by cytosolic buffer to remove excess liposomes and proteins.  
24 After the washing, the cantilever tip was approached and the imaging was performed under the  
25 buffer.

26

### 27 ***Quantitative data analyses of EM and HS-AFM images***

28 The EM and HS-AFM images were randomly captured to avoid data manipulation and  
29 representative images were shown in all the figures. The average pitch between the  
30 dynamin-amphiphysin washer rings in EM images (Figure 2) and HS-AFM images (Figure 3),  
31 diameter of vesicles, intervals between constriction sites and size of clusters generated by either  
32 dynamin-amphiphysin complex or dynamin (Figure 5), were all measured by FIJI (Schindelin et

1 al., 2012). Experimental data was statistically analyzed using Excel (Microsoft) or Prism 7  
2 (GraphPad software).  
3

1 ***ACKNOWLEDGEMENTS***

2 The authors thank Dr. Aurélien Roux and Dr. Adai Colom (University of Geneva), Dr. Lorena  
3 Redondo-Morata (INSERM U1006/Aix-Marseille Université) and Dr. Masatoshi Ichikawa  
4 (Kyoto University) for their critical reading of the manuscript. This work was supported by  
5 JST/CREST program (#JPMJCR13M1) (to T.A. and K.T.). This work was also supported in part  
6 by JSPS KAKENHI Grant Numbers JP15H03540 (to T.U.), MEXT KAKENHI Grant Numbers  
7 JP16H00830 and JP16H00758 (to T.U.).



- 1 ***COMPETING INTERESTS***
- 2 No competing interests declared.
- 3

1 **REFERENCES**

- 2 Ando, T., Uchihashi, T., & Kodera, N. (2013). High-speed AFM and applications to  
3 biomolecular systems. *Annu Rev Biophys*, *42*, 393-414.  
4 doi:10.1146/annurev-biophys-083012-130324
- 5 Antonny, B., Burd, C., De Camilli, P., Chen, E., Daumke, O., Faelber, K., . . . Schmid, S. (2016).  
6 Membrane fission by dynamin: what we know and what we need to know. *EMBO J*,  
7 *35*(21), 2270-2284. doi:10.15252/embj.201694613
- 8 Bashkurov, P. V., Akimov, S. A., Evseev, A. I., Schmid, S. L., Zimmerberg, J., & Frolov, V. A.  
9 (2008). GTPase cycle of dynamin is coupled to membrane squeeze and release, leading  
10 to spontaneous fission. *Cell*, *135*(7), 1276-1286. doi:10.1016/j.cell.2008.11.028
- 11 Cao, H., Garcia, F., & McNiven, M. A. (1998). Differential distribution of dynamin isoforms in  
12 mammalian cells. *Mol Biol Cell*, *9*(9), 2595-2609.
- 13 Chen, Y. J., Zhang, P., Egelman, E. H., & Hinshaw, J. E. (2004). The stalk region of dynamin  
14 drives the constriction of dynamin tubes. *Nat Struct Mol Biol*, *11*(6), 574-575.  
15 doi:10.1038/nsmb762
- 16 Cocucci, E., Gaudin, R., & Kirchhausen, T. (2014). Dynamin recruitment and membrane  
17 scission at the neck of a clathrin-coated pit. *Mol Biol Cell*, *25*(22), 3595-3609.  
18 doi:10.1091/mbc.E14-07-1240
- 19 Colom, A., Redondo-Morata, L., Chiaruttini, N., Roux, A., & Scheuring, S. (2017). Dynamic  
20 remodeling of the dynamin helix during membrane constriction. *Proc Natl Acad Sci U S*  
21 *A*, *114*(21), 5449-5454. doi:10.1073/pnas.1619578114
- 22 Cook, T., Mesa, K., & Urrutia, R. (1996). Three dynamin-encoding genes are differentially  
23 expressed in developing rat brain. *J Neurochem*, *67*(3), 927-931.
- 24 Cook, T. A., Urrutia, R., & McNiven, M. A. (1994). Identification of dynamin 2, an isoform  
25 ubiquitously expressed in rat tissues. *Proc Natl Acad Sci U S A*, *91*(2), 644-648.
- 26 David, C., McPherson, P. S., Mundigl, O., & de Camilli, P. (1996). A role of amphiphysin in  
27 synaptic vesicle endocytosis suggested by its binding to dynamin in nerve terminals.  
28 *Proc Natl Acad Sci U S A*, *93*(1), 331-335.
- 29 Di Paolo, G., Sankaranarayanan, S., Wenk, M. R., Daniell, L., Perucco, E., Caldarone, B. J., . . .  
30 De Camilli, P. (2002). Decreased synaptic vesicle recycling efficiency and cognitive  
31 deficits in amphiphysin 1 knockout mice. *Neuron*, *33*(5), 789-804.
- 32 Dittman, J., & Ryan, T. A. (2009). Molecular circuitry of endocytosis at nerve terminals. *Annu*  
33 *Rev Cell Dev Biol*, *25*, 133-160. doi:10.1146/annurev.cellbio.042308.113302

- 1 Ekstrom von Lubitz, D. K. (1981). Ultrastructure of the lateral-line sense organs of the ratfish,  
2 Chimaera monstrosa. *Cell Tissue Res*, 215(3), 651-665.
- 3 Evergren, E., Marcucci, M., Tomilin, N., Low, P., Slepnev, V., Andersson, F., . . . Shupliakov, O.  
4 (2004). Amphiphysin is a component of clathrin coats formed during synaptic vesicle  
5 recycling at the lamprey giant synapse. *Traffic*, 5(7), 514-528.  
6 doi:10.1111/j.1398-9219.2004.00198.x
- 7 Faelber, K., Held, M., Gao, S., Posor, Y., Haucke, V., Noe, F., & Daumke, O. (2012). Structural  
8 insights into dynamin-mediated membrane fission. *Structure*, 20(10), 1621-1628.  
9 doi:10.1016/j.str.2012.08.028
- 10 Faelber, K., Posor, Y., Gao, S., Held, M., Roske, Y., Schulze, D., . . . Daumke, O. (2011). Crystal  
11 structure of nucleotide-free dynamin. *Nature*, 477(7366), 556-560.  
12 doi:10.1038/nature10369
- 13 Ferguson, S. M., Brasnjo, G., Hayashi, M., Wolfel, M., Collesi, C., Giovedi, S., . . . De Camilli,  
14 P. (2007). A selective activity-dependent requirement for dynamin 1 in synaptic vesicle  
15 endocytosis. *Science*, 316(5824), 570-574. doi:10.1126/science.1140621
- 16 Ferguson, S. M., & De Camilli, P. (2012). Dynamin, a membrane-remodelling GTPase. *Nat Rev*  
17 *Mol Cell Biol*, 13(2), 75-88. doi:10.1038/nrm3266
- 18 Ford, M. G., Jenni, S., & Nunnari, J. (2011). The crystal structure of dynamin. *Nature*,  
19 477(7366), 561-566. doi:10.1038/nature10441
- 20 Fuchs, M., Brandstatter, J. H., & Regus-Leidig, H. (2014). Evidence for a Clathrin-independent  
21 mode of endocytosis at a continuously active sensory synapse. *Front Cell Neurosci*, 8,  
22 60. doi:10.3389/fncel.2014.00060
- 23 Heuser, J., & Miledi, R. (1971). Effects of lanthanum ions on function and structure of frog  
24 neuromuscular junctions. *Proc R Soc Lond B Biol Sci*, 179(1056), 247-260.
- 25 Heuser, J. E., & Reese, T. S. (1973). Evidence for recycling of synaptic vesicle membrane  
26 during transmitter release at the frog neuromuscular junction. *J Cell Biol*, 57(2),  
27 315-344.
- 28 Hinshaw, J. E., & Schmid, S. L. (1995). Dynamin self-assembles into rings suggesting a  
29 mechanism for coated vesicle budding. *Nature*, 374(6518), 190-192.  
30 doi:10.1038/374190a0
- 31 Kirchhausen, T., Owen, D., & Harrison, S. C. (2014). Molecular structure, function, and  
32 dynamics of clathrin-mediated membrane traffic. *Cold Spring Harb Perspect Biol*, 6(5),  
33 a016725. doi:10.1101/cshperspect.a016725

- 1 Koch, D., Spiwox-Becker, I., Sabanov, V., Sinning, A., Dugladze, T., Stellmacher, A., . . .  
2 Qualmann, B. (2011). Proper synaptic vesicle formation and neuronal network activity  
3 critically rely on syndapin I. *EMBO J*, *30*(24), 4955-4969. doi:10.1038/emboj.2011.339
- 4 Koenig, J. H., & Ikeda, K. (1989). Disappearance and reformation of synaptic vesicle  
5 membrane upon transmitter release observed under reversible blockage of membrane  
6 retrieval. *J Neurosci*, *9*(11), 3844-3860.
- 7 Marks, B., Stowell, M. H., Vallis, Y., Mills, I. G., Gibson, A., Hopkins, C. R., & McMahon, H. T.  
8 (2001). GTPase activity of dynamin and resulting conformation change are essential for  
9 endocytosis. *Nature*, *410*(6825), 231-235. doi:10.1038/35065645
- 10 Mattila, J. P., Shnyrova, A. V., Sundborger, A. C., Hortelano, E. R., Fuhrmans, M., Neumann,  
11 S., . . . Frolov, V. A. (2015). A hemi-fission intermediate links two mechanistically  
12 distinct stages of membrane fission. *Nature*, *524*(7563), 109-113.  
13 doi:10.1038/nature14509
- 14 McMahon, H. T., & Boucrot, E. (2011). Molecular mechanism and physiological functions of  
15 clathrin-mediated endocytosis. *Nat Rev Mol Cell Biol*, *12*(8), 517-533.  
16 doi:10.1038/nrm3151
- 17 Mears, J. A., Ray, P., & Hinshaw, J. E. (2007). A corkscrew model for dynamin constriction.  
18 *Structure*, *15*(10), 1190-1202. doi:10.1016/j.str.2007.08.012
- 19 Milosevic, I., Giovedi, S., Lou, X., Raimondi, A., Collesi, C., Shen, H., . . . De Camilli, P.  
20 (2011). Recruitment of endophilin to clathrin-coated pit necks is required for efficient  
21 vesicle uncoating after fission. *Neuron*, *72*(4), 587-601.  
22 doi:10.1016/j.neuron.2011.08.029
- 23 Morlot, S., Galli, V., Klein, M., Chiaruttini, N., Manzi, J., Humbert, F., . . . Roux, A. (2012).  
24 Membrane shape at the edge of the dynamin helix sets location and duration of the  
25 fission reaction. *Cell*, *151*(3), 619-629. doi:10.1016/j.cell.2012.09.017
- 26 Peter, B. J., Kent, H. M., Mills, I. G., Vallis, Y., Butler, P. J., Evans, P. R., & McMahon, H. T.  
27 (2004). BAR domains as sensors of membrane curvature: the amphiphysin BAR  
28 structure. *Science*, *303*(5657), 495-499. doi:10.1126/science.1092586
- 29 Reubold, T. F., Faelber, K., Plattner, N., Posor, Y., Ketel, K., Curth, U., . . . Eschenburg, S.  
30 (2015). Crystal structure of the dynamin tetramer. *Nature*, *525*(7569), 404-408.  
31 doi:10.1038/nature14880
- 32 Roux, A., Uyhazi, K., Frost, A., & De Camilli, P. (2006). GTP-dependent twisting of dynamin  
33 implicates constriction and tension in membrane fission. *Nature*, *441*(7092), 528-531.

- 1           doi:10.1038/nature04718
- 2   Samorajski, T., Ordy, J. M., & Keefe, J. R. (1966). Structural organization of the retina in the  
3           tree shrew (*Tupaia glis*). *J Cell Biol*, 28(3), 489-504.
- 4   Schindelin, J., Arganda-Carreras, I., Frise, E., Kaynig, V., Longair, M., Pietzsch, T., . . . Cardona,  
5           A. (2012). Fiji: an open-source platform for biological-image analysis. *Nat Methods*,  
6           9(7), 676-682. doi:10.1038/nmeth.2019
- 7   Schmid, S. L., & Frolov, V. A. (2011). Dynamin: functional design of a membrane fission  
8           catalyst. *Annu Rev Cell Dev Biol*, 27, 79-105.  
9           doi:10.1146/annurev-cellbio-100109-104016
- 10   Simunovic, M., Manneville, J. B., Renard, H. F., Evergren, E., Raghunathan, K., Bhatia, D., . . .  
11           Callan-Jones, A. (2017). Friction Mediates Scission of Tubular Membranes Scaffolded  
12           by BAR Proteins. *Cell*, 170(1), 172-184 e111. doi:10.1016/j.cell.2017.05.047
- 13   Stowell, M. H., Marks, B., Wigge, P., & McMahon, H. T. (1999). Nucleotide-dependent  
14           conformational changes in dynamin: evidence for a mechanochemical molecular spring.  
15           *Nat Cell Biol*, 1(1), 27-32. doi:10.1038/8997
- 16   Sundborger, A. C., Fang, S., Heymann, J. A., Ray, P., Chappie, J. S., & Hinshaw, J. E. (2014). A  
17           dynamin mutant defines a superconstricted pre-fission state. *Cell Rep*, 8(3), 734-742.  
18           doi:10.1016/j.celrep.2014.06.054
- 19   Sweitzer, S. M., & Hinshaw, J. E. (1998). Dynamin undergoes a GTP-dependent conformational  
20           change causing vesiculation. *Cell*, 93(6), 1021-1029.
- 21   Takei, K., Haucke, V., Slepnev, V., Farsad, K., Salazar, M., Chen, H., & De Camilli, P. (1998).  
22           Generation of coated intermediates of clathrin-mediated endocytosis on protein-free  
23           liposomes. *Cell*, 94(1), 131-141.
- 24   Takei, K., McPherson, P. S., Schmid, S. L., & De Camilli, P. (1995). Tubular membrane  
25           invaginations coated by dynamin rings are induced by GTP-gamma S in nerve terminals.  
26           *Nature*, 374(6518), 186-190. doi:10.1038/374186a0
- 27   Takei, K., Slepnev, V. I., & De Camilli, P. (2001). Interactions of dynamin and amphiphysin  
28           with liposomes. *Methods Enzymol*, 329, 478-486.
- 29   Takei, K., Slepnev, V. I., Haucke, V., & De Camilli, P. (1999). Functional partnership between  
30           amphiphysin and dynamin in clathrin-mediated endocytosis. *Nat Cell Biol*, 1(1), 33-39.  
31           doi:10.1038/9004
- 32   Warnock, D. E., Hinshaw, J. E., & Schmid, S. L. (1996). Dynamin self-assembly stimulates its  
33           GTPase activity. *J Biol Chem*, 271(37), 22310-22314.

- 1 Wigge, P., Kohler, K., Vallis, Y., Doyle, C. A., Owen, D., Hunt, S. P., & McMahon, H. T. (1997).  
2 Amphiphysin heterodimers: potential role in clathrin-mediated endocytosis. *Mol Biol*  
3 *Cell*, 8(10), 2003-2015.
- 4 Wilson-Kubalek, E. M., Brown, R. E., Celia, H., & Milligan, R. A. (1998). Lipid nanotubes as  
5 substrates for helical crystallization of macromolecules. *Proc Natl Acad Sci U S A*,  
6 95(14), 8040-8045.
- 7 Yoshida, Y., Kinuta, M., Abe, T., Liang, S., Araki, K., Cremona, O., . . . Takei, K. (2004). The  
8 stimulatory action of amphiphysin on dynamin function is dependent on lipid bilayer  
9 curvature. *EMBO J*, 23(17), 3483-3491. doi:10.1038/sj.emboj.7600355
- 10 Zhang, P., & Hinshaw, J. E. (2001). Three-dimensional reconstruction of dynamin in the  
11 constricted state. *Nat Cell Biol*, 3(10), 922-926. doi:10.1038/ncb1001-922  
12  
13

1 **FIGURE LEGENDS**

2 **Figure 1. GTP hydrolysis is required and sufficient for membrane constriction by**

3 **dynamamin-amphiphysin ring complexes** (A) Electron micrographs of lipid tubules induced by  
4 dynamamin-amphiphysin ring complex before GTP addition (No GTP) and at different time points  
5 after addition of 1 mM GTP (GTP 1 s, GTP 5 s, GTP 10 s, GTP 30 s and GTP 1 min). More than  
6 thirty samples from three individual experiments were examined and representative images are  
7 shown. Scale bar is 200 nm. (B) Electron micrographs of lipid tubules induced by  
8 dynamamin-amphiphysin ring complex without guanine nucleotide (No GTP) or with a transition  
9 states analogue of GTPase reaction, by adding 1 mM each of slowly hydrolyzable GTP analogue  
10 (GTP $\gamma$ S), nonhydrolyzable GTP analogue (GMP-PNP), GDP combined with vanadate (GDP +  
11 vanadate), GDP (GDP), or GTP (GTP) for 10 min. More than thirty samples from three individual  
12 experiments were examined and representative images are shown. Scale bar is 200 nm.

13  
14 **Figure 1-figure Supplement 1. Purified dynamamin and amphiphysin forms ring-shaped**

15 **complexes** (A) SDS-PAGE of purified dynamamin (Dynamamin) and amphiphysin (Amphiphysin).  
16 (B) Negative staining electron micrographs of dynamamin alone (Dynamamin), dynamamin and  
17 amphiphysin (Dynamamin + Amphiphysin) and amphiphysin alone (Amphiphysin) incubated in  
18 cytosolic buffer with physiological salt concentration and PH (see materials and methods).  
19 Scale bar is 100 nm.

20  
21 **Figure 2. GTP hydrolysis induces clustering of dynamamin-amphiphysin complexes on lipid**

22 **nanotubes** (A) Electron micrographs of a lipid nanotube (Nanotube) and those with  
23 dynamamin-amphiphysin complexes before GTP addition (No GTP) and at different time points  
24 after GTP addition (GTP 1 s, GTP 20 s, GTP 30 s, and GTP 1 min). Clusters of  
25 dynamamin-amphiphysin ring complexes are indicated (white brackets). More than thirty samples  
26 from three individual experiments were examined and representative images are shown. Scale bar  
27 is 100 nm. (B) Electron micrographs of lipid nanotubes after addition of dynamamin-amphiphysin  
28 complexes without guanine nucleotide (No GTP) or with a transition states analogue of GTPase  
29 reaction, by adding 1 mM each of slowly hydrolysable GTP analogue (GTP $\gamma$ S), nonhydrolyzable  
30 GTP analogue (GMP-PNP), GDP combined with vanadate (GDP + vanadate), GDP (GDP) and  
31 GTP (GTP) for 10 min. More than thirty samples from three individual experiments were  
32 examined and representative images are shown. Clusters of dynamamin-amphiphysin ring  
33 complexes are indicated (white brackets). The average pitch of washer-rings in the clusters is

1 15.00 ± 2.2 nm (mean pitch ± s.e.m., n=63 from 7 nanotubes) in GDP + vanadate, while the  
2 average pitch of the ring complexes is 19.96 ± 0.47 nm (mean pitch ± s.e.m., n=81 from 9  
3 nanotubes) in No GTP control. Scale bar is 100 nm.

4

5 **Figure 3. Dynamic clustering of dynamin-amphiphysin rings during GTP hydrolysis (A)**

6 HS-AFM images captured at 1 frame/s of dynamin-amphiphysin ring complexes on membrane  
7 tubules before (0 s and 21 s) and after GTP addition at different time points (42 s, 63 s, 84 s, 100  
8 s, 115 s and 131 s). Dynamin-amphiphysin rings (arrowheads) are assembled into three distinct  
9 clusters (1, 2 and 3 at 131 s). The pitch of dynamin-amphiphysin rings on the lipid tubule was  
10 22.04 ± 0.68 nm (mean pitch ± s.e.m., n=36 from 3 time points) before GTP addition and 15.72 ±  
11 0.30 nm (mean pitch ± s.e.m., n=36 from 9 time points) after GTP addition. (B) Particle tracking  
12 of dynamin-amphiphysin rings before (5-21 sec) and after addition of 1mM GTP (38-54 sec,  
13 38-86 sec and 38-118 sec) from Supplementary Movie S4 and S5, respectively. Particle tracking  
14 of the complexes in the cluster 2 (light blue, dark blue and magenta) and cluster 3 (red, yellow and  
15 green) are shown. (C) Dynamin-amphiphysin rings tend to constrict during clustering. Average  
16 heights before ( $0 \leq t \leq 100$  sec) and after clustering ( $101 \text{ sec} \leq t$ ) are 38.38 ± 0.17 nm and 36.48 ±  
17 0.18 nm for cluster 1, 32.62 ± 0.15 nm and 32.56 ± 0.18 nm for cluster 2, 27.90 ± 0.13 nm and  
18 26.75 ± 0.18 nm for cluster 3, respectively. The heights were measured from the substrate  
19 surface. The marks \*\*\* indicate  $p < 0.001$  and n.s. is not significant, respectively.

20

21 **Figure 3-figure Supplement 1. HS-AFM imaging of LUV and its tubulation by**

22 **dynamin-amphiphysin complex (A)** HS-AFM images of a LUV. Scale bar is 50 nm. (B) Lipid  
23 tubules induced from LUVs in the presence of dynamin-amphiphysin complexes. Scale bar is  
24 200 nm.

25

26 **Figure 3-figure Supplement 2. Dynamin-amphiphysin rings constrict during cluster**

27 **formation** Maximum heights of each rings plotted as a function of time (left panels) and their  
28 average ring heights before (0-100sec) and after clustering (101sec-) are shown for cluster1, 2  
29 and 3 (A, B and C, respectively). \*\*\*:  $p < 0.001$ , \*\*:  $p < 0.01$ , \*:  $p < 0.1$ , n.s.: not significant.

30

31 **Figure 4. Membrane fission occurs at the protein-uncoated regions flanking**

32 **dynamin-amphiphysin clusters (A)** Clips of HS-AFM images captured at 0.42 frames/s  
33 showing membrane fission by dynamin-amphiphysin complexes (0 s, 125.3 s, 185.5 s and 227.5



1 s) in Supplementary Movie S6. Membrane fission occurred at flanking regions of a  
2 dynamin-amphiphysin cluster. Corresponding height profiles along the red line (shown in the 0 s  
3 image) passing through the two fission points (arrows marked with FP.1 and FP.2) are shown  
4 below, together with clustered dynamin-amphiphysin ring complexes (red arrowheads). (B)  
5 Height profiles at fission points (FP.1 and FP.2) over time before (Supplementary Movie S7) and  
6 after constriction (Supplementary Movie S6). The heights of the lipid tubules from the substrate  
7 surface were measured at the fission points. (C) Clips of HS-AFM images showing clustering  
8 dynamin-amphiphysin complexes and membrane constriction at flanking regions of the cluster  
9 (arrow). HS-AFM images are shown in pseudo color. Scale bar is 40 nm.

10

11 ***Figure 5. Amphiphysin contributes to generation of uniformly-sized vesicles by controlling***  
12 ***dynamin-amphiphysin clusters*** (A) Representative EM images of membrane vesicles generated  
13 by dynamin-amphiphysin complexes (Dynamin + Amphiphysin) or dynamin alone (Dynamin)  
14 after addition of GTP. Size distribution of generated vesicles are shown in the right panel. The  
15 average sizes of vesicles were  $69.98 \pm 0.61$  nm (mean diameter  $\pm$  s.e.m.,  $n > 30$ ,  $N = 3$ ) for  
16 dynamin-amphiphysin complexes and  $204.57 \pm 1.10$  nm (mean diameter  $\pm$  s.e.m.,  $n > 45$ ,  $N = 3$ ) for  
17 dynamin alone. Scale bar is 200 nm. (B) Representative EM images of membrane constriction  
18 induced by dynamin-amphiphysin complexes (Dynamin + Amphiphysin) and dynamin alone  
19 (Dynamin) in the presence of GDP and vanadate. Distribution of intervals between constriction  
20 sites are quantified in the right panel. The average intervals of constriction sites induced are  
21  $150.28 \pm 9.75$  nm (mean intervals  $\pm$  s.e.m.,  $n = 25$  from 7 tubes) by dynamin-amphiphysin  
22 complexes and  $193.5 \pm 15.8$  nm (mean intervals  $\pm$  s.e.m.,  $n = 46$  from 15 tubes) by dynamin alone.  
23 Scale bar is 200 nm. (C) Clustering of dynamin-amphiphysin complexes (Dynamin +  
24 Amphiphysin) and dynamin alone (Dynamin) on lipid nanotubes in the presence of GDP and  
25 vanadate. Clusters of Dynamin-amphiphysin rings are indicated (white brackets). Distribution of  
26 cluster size were shown as scattered plot in the right panel. Average size of the clusters formed by  
27 dynamin-amphiphysin complexes and dynamin alone are  $34.22 \pm 1.66$  nm (mean cluster size  $\pm$   
28 s.e.m.,  $n = 36$  from 7 tubes) and  $59.27 \pm 4.69$  nm (mean cluster size  $\pm$  s.e.m.,  $n = 30$  from 5 tubes)  
29 respectively. Scale bar is 100 nm.

30

31 ***Figure 6. Clusterase model of membrane constriction and fission mediated by***  
32 ***dynamin-amphiphysin complexes.*** (A) Assembly and alignment of dynamin-amphiphysin  
33 washer rings-like or helical polymers on membrane tubules in the presence of GTP. (B)

1 Dynamic longitudinal rearrangement of dynamin-amphiphysin rings to form clusters induced by  
2 GTP hydrolysis. (C) Constriction of the clustered dynamin-amphiphysin which may provide  
3 local tension and/or torsion and/or friction at the edge of the clusters to induce membrane  
4 constriction. (D) Membrane fission caused by disassembly of dynamin-amphiphysin complexes  
5 into oligomers upon release of GTP hydrolytic products.

6

7 ***Supplementary Movie S1. HS-AFM imaging of a LUV***

8

9 ***Supplementary Movie S2. HS-AFM imaging of a lipid tubules induced from LUVs by***  
10 ***dynamin-amphiphysin complexes***

11

12 ***Supplementary Movie S3. HS-AFM imaging of cluster formation by dynamin-amphiphysin***  
13 ***ring complexes***

14

15 ***Supplementary Movie S4. Particle tracking of dynamin-amphiphysin ring complexes before***  
16 ***GTP addition (frames from 5 s to 21 s in Supplementary Movie S3)***

17

18 ***Supplementary Movie S5. Particle tracking of dynamin-amphiphysin ring complexes after***  
19 ***GTP addition (frames from 38 s to 124 s in Supplementary Movie S3)***

20

21 ***Supplementary Movie S6. HS-AFM imaging of constriction and fission of lipid tubules by***  
22 ***dynamin-amphiphysin complexes***

23

24 ***Supplementary Movie S7. HS-AFM imaging of lipid tubules before constriction and fission***  
25 ***by dynamin-amphiphysin complexes***

26

27 ***Supplementary Movie S8. HS-AFM imaging of constriction and fission of lipid tubules by***  
28 ***dynamin-amphiphysin complexes***

29

30

**Figure 1. Takeda et al.**

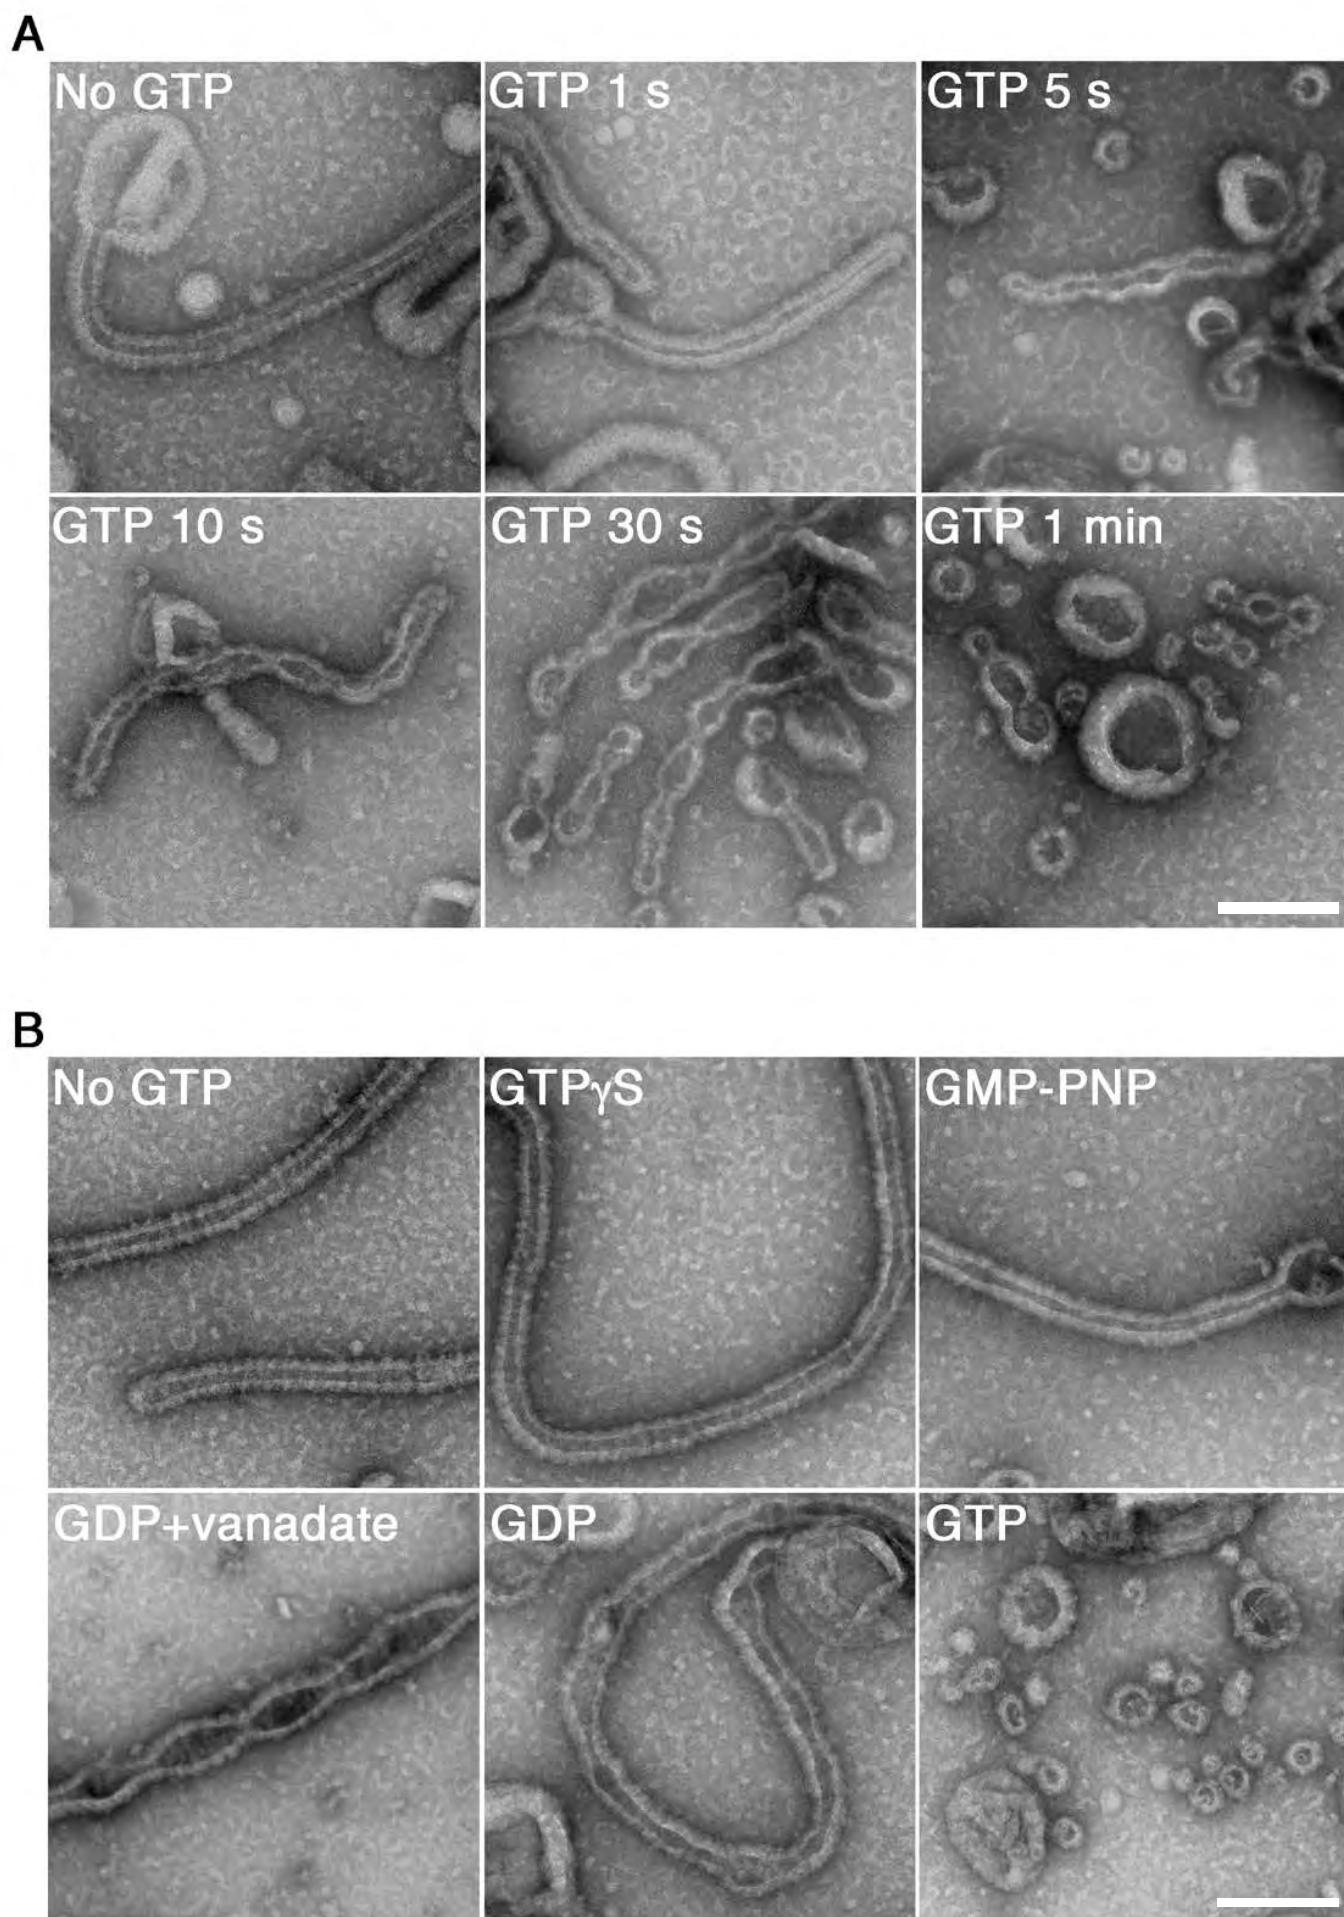

**Figure 1-figure supplement 1. Takeda et al.**

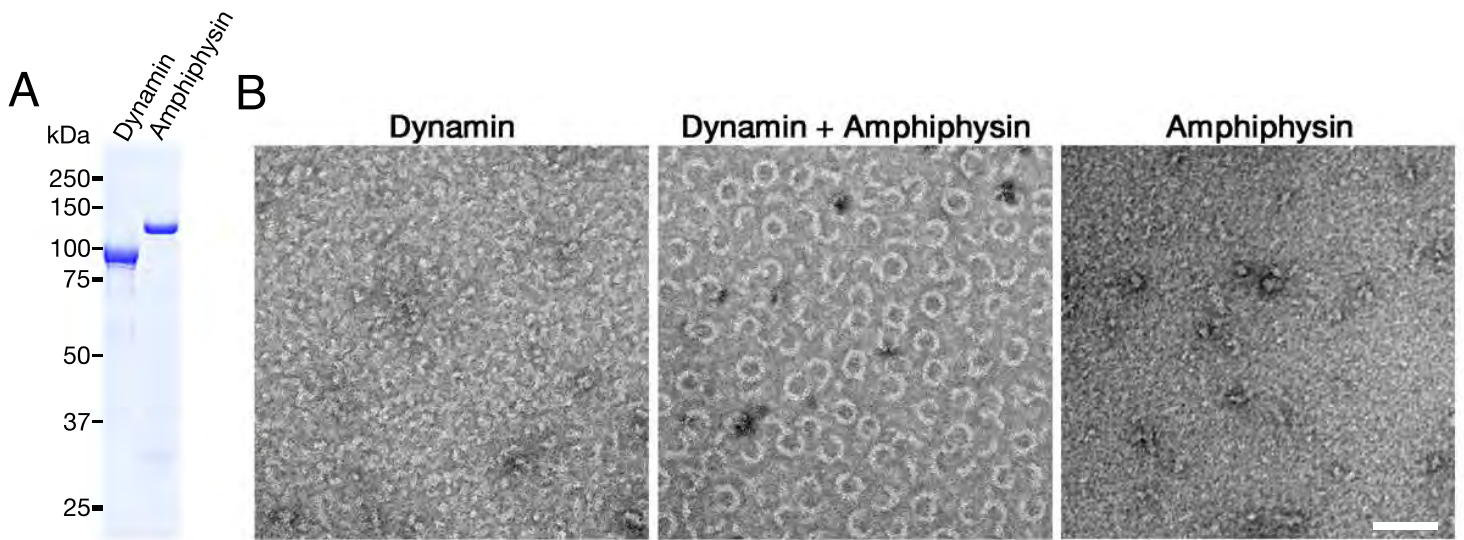

**Figure 2. Takeda et al.**

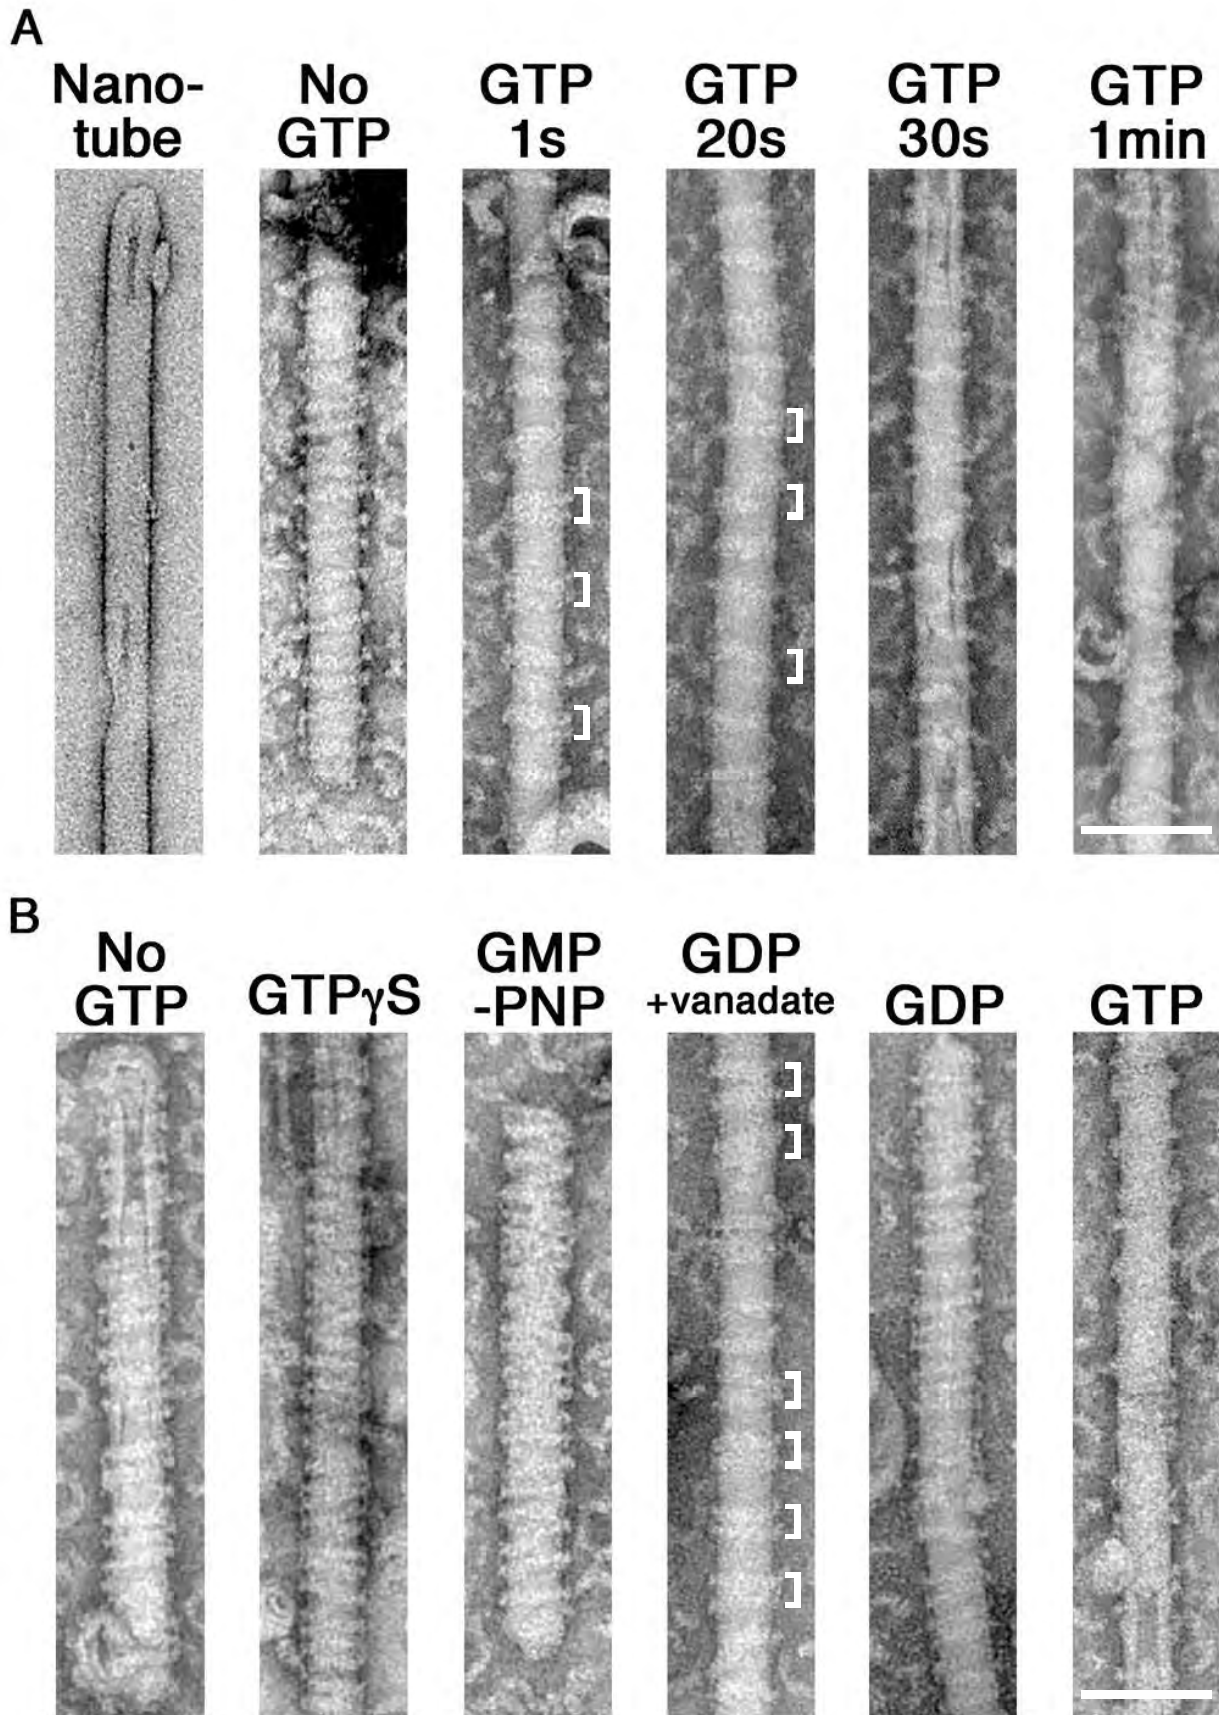

Figure 3. Takeda et al.

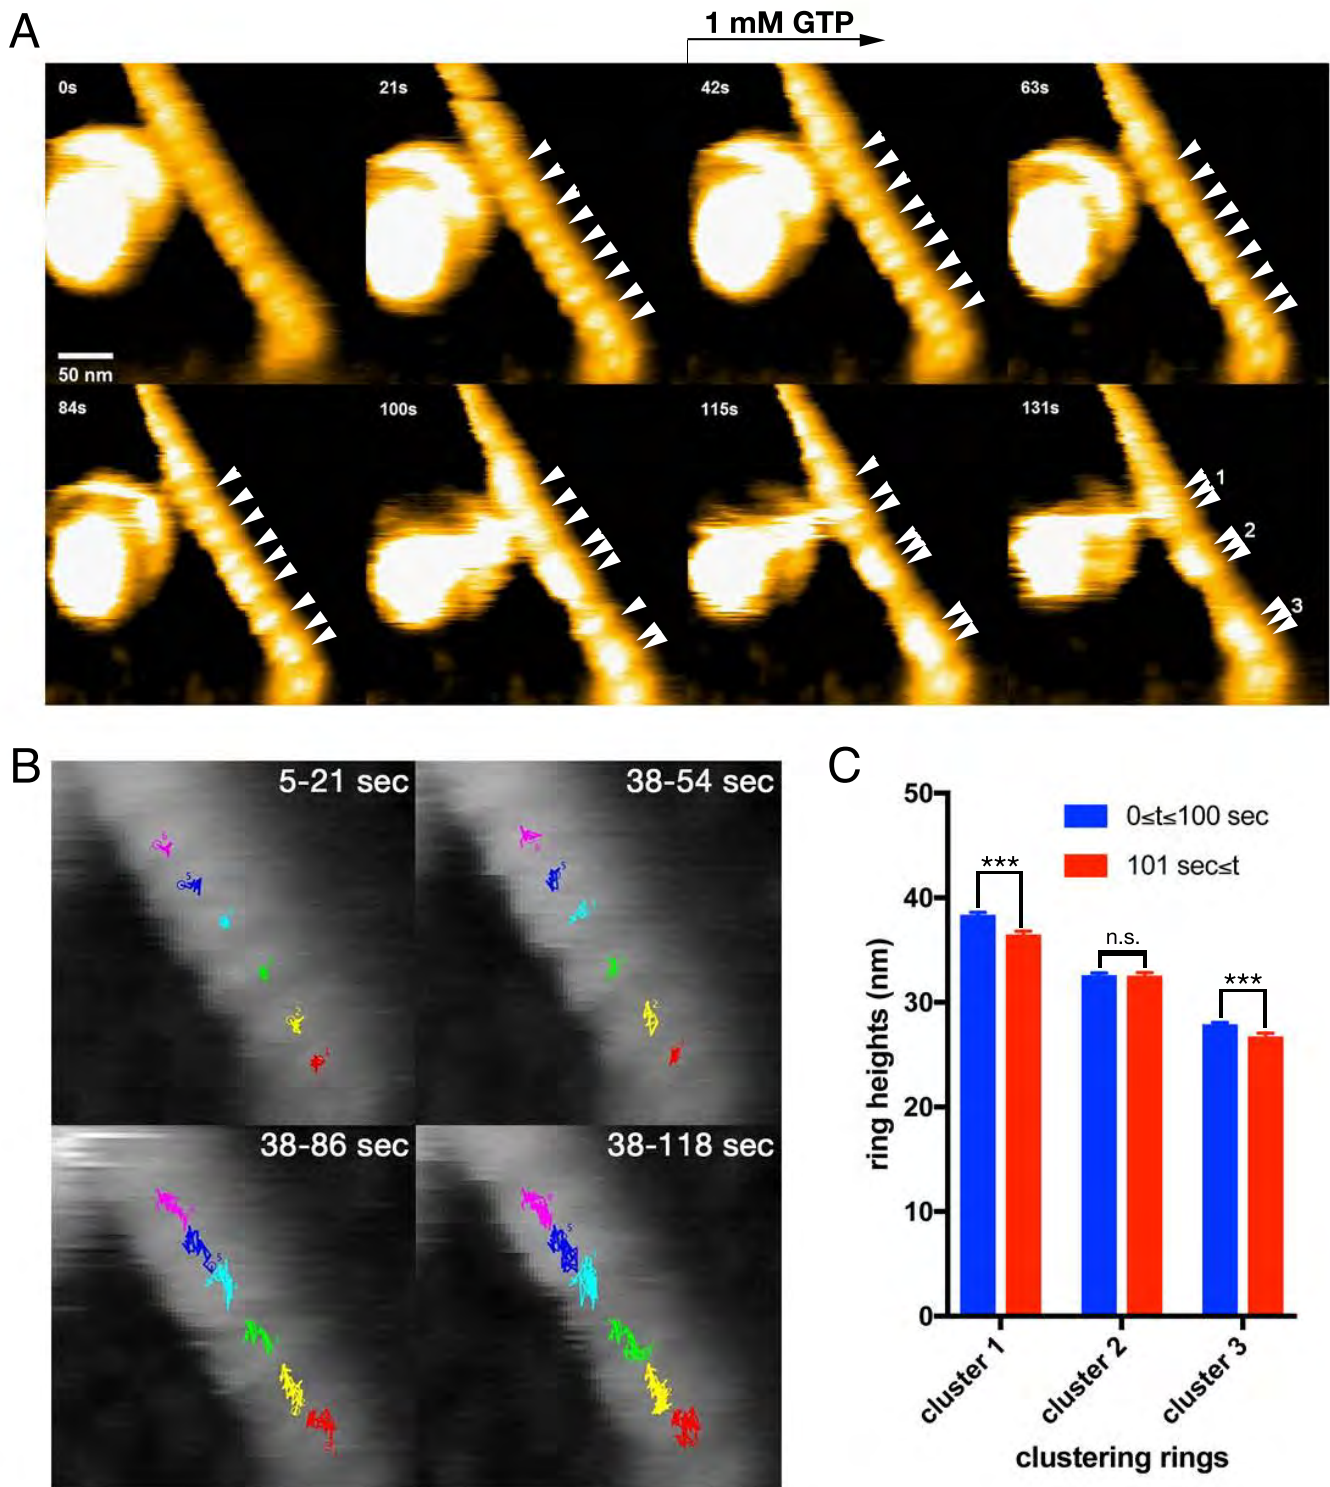

**Figure 3-figure supplement 1. Takeda et al.**

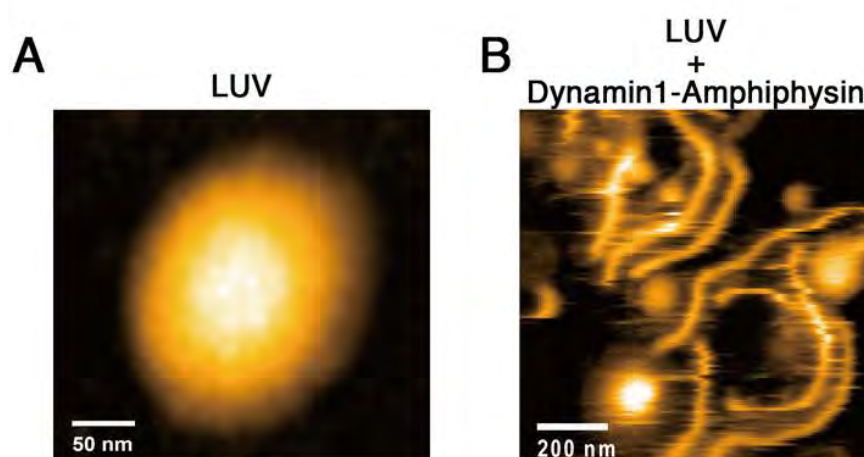

## Figure 3-figure Supplement 2. Takeda et al.

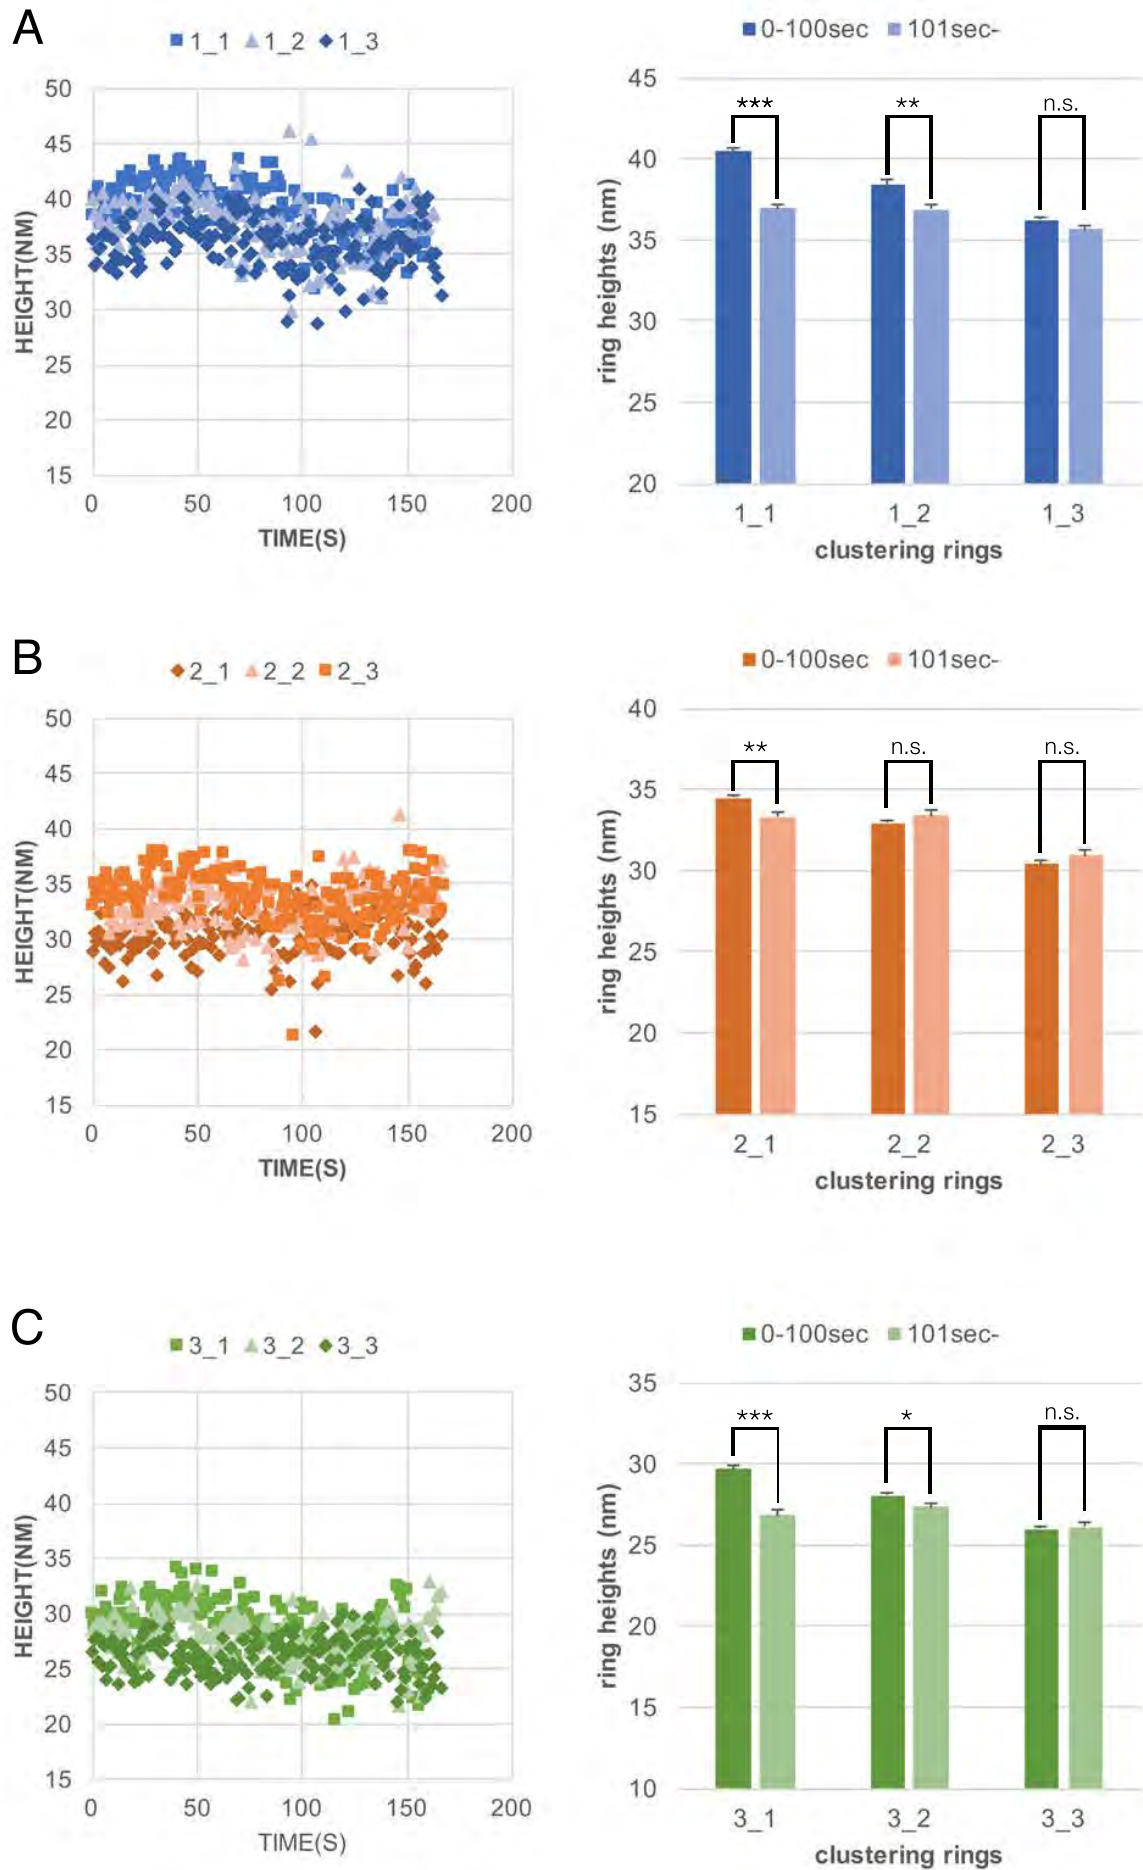



## Figure 4. Takeda et al.

A

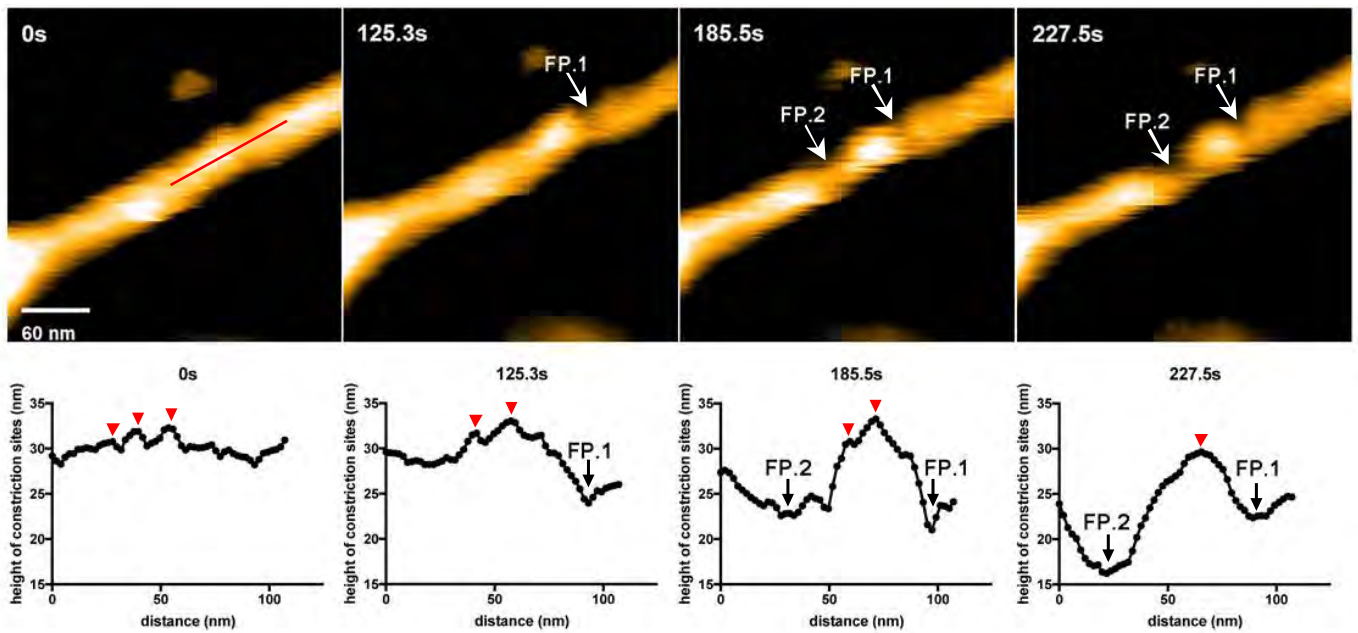

B

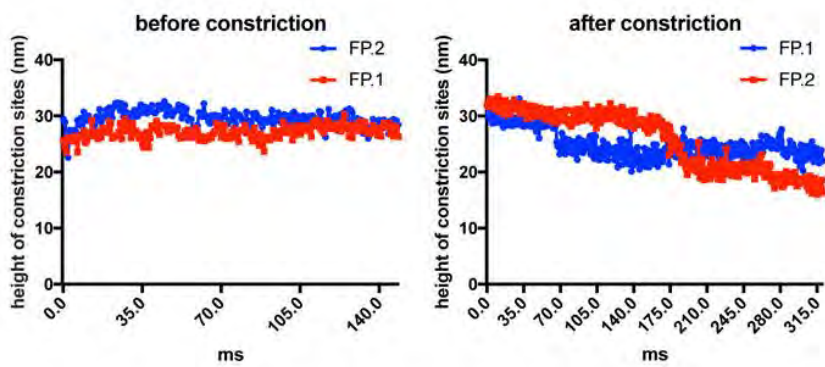

C

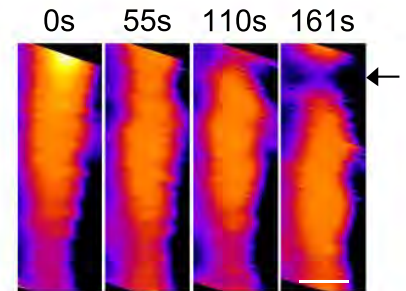

**Figure 5. Takeda et al.**

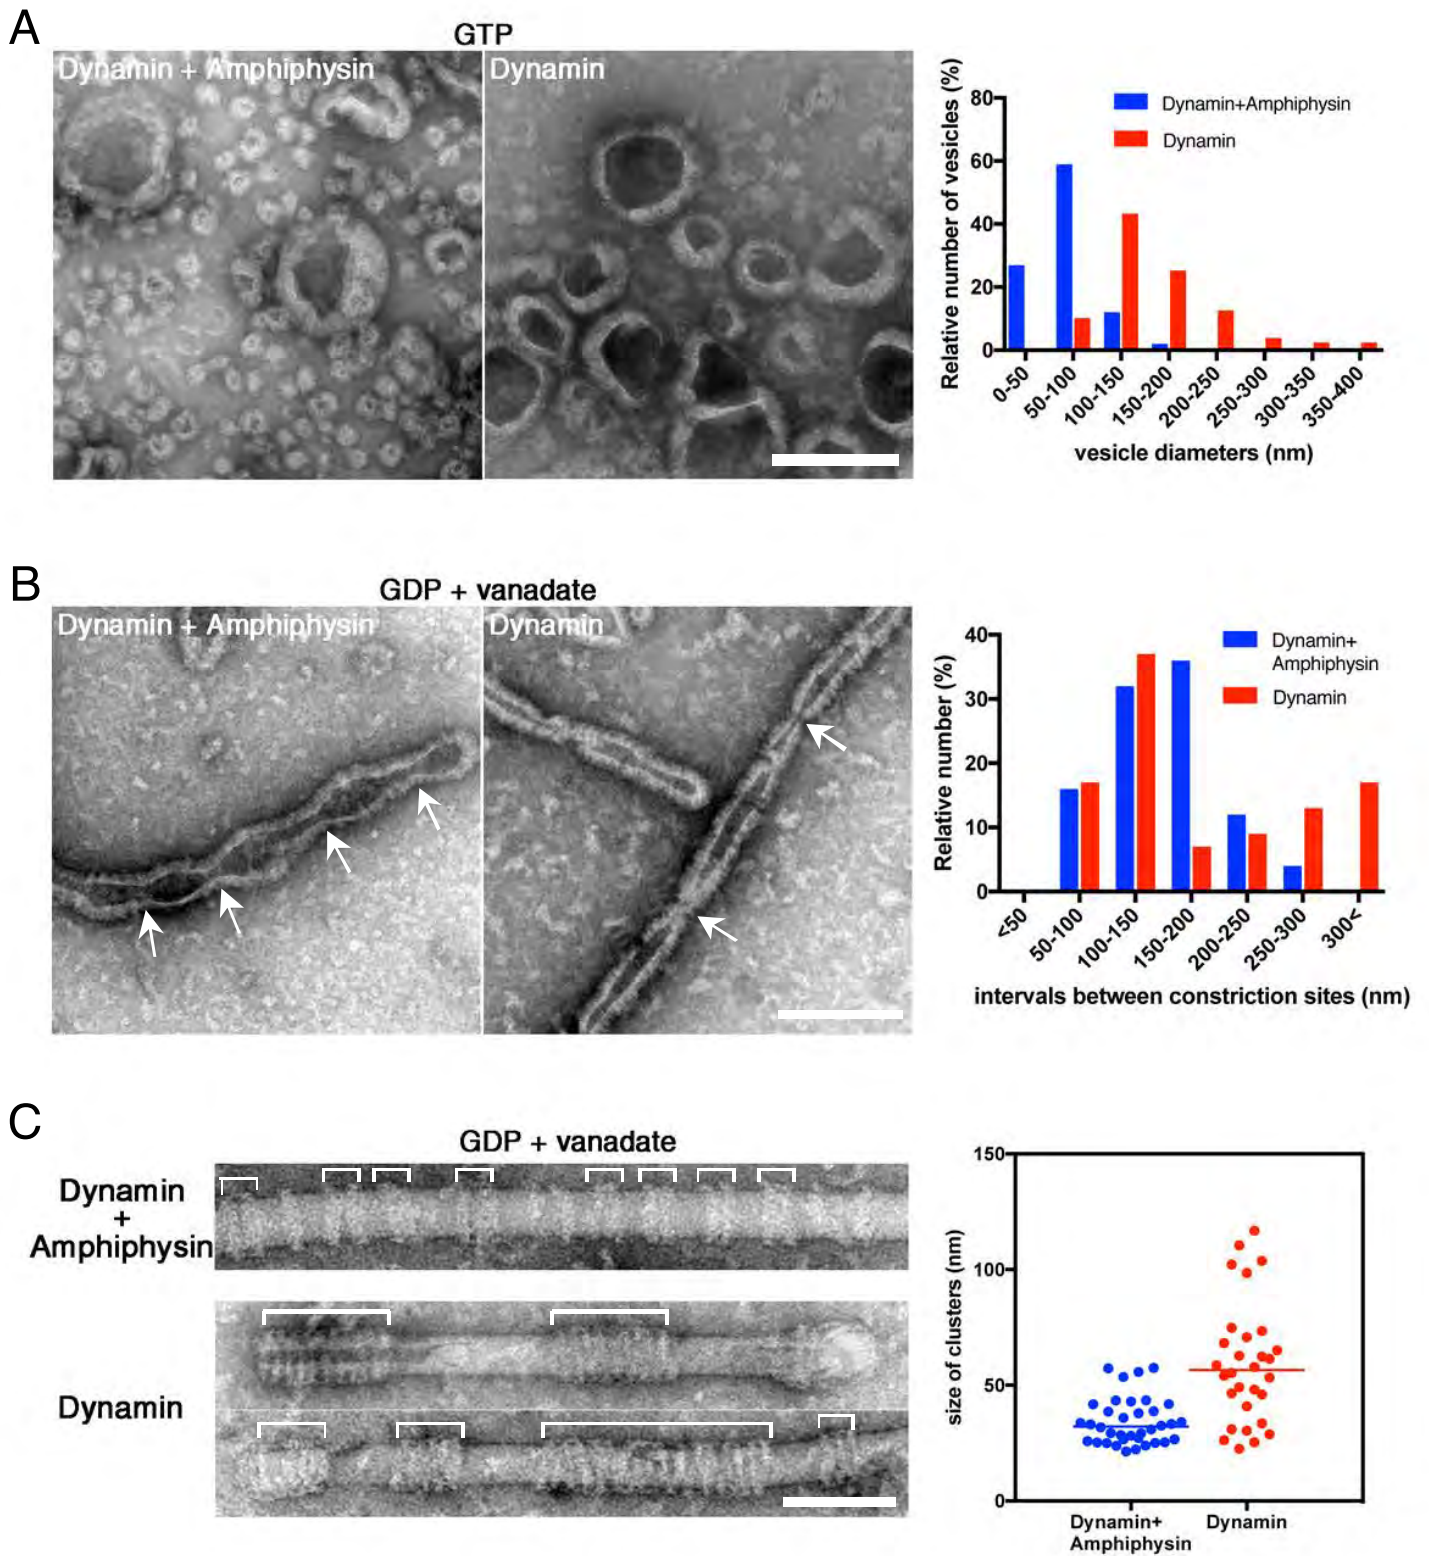

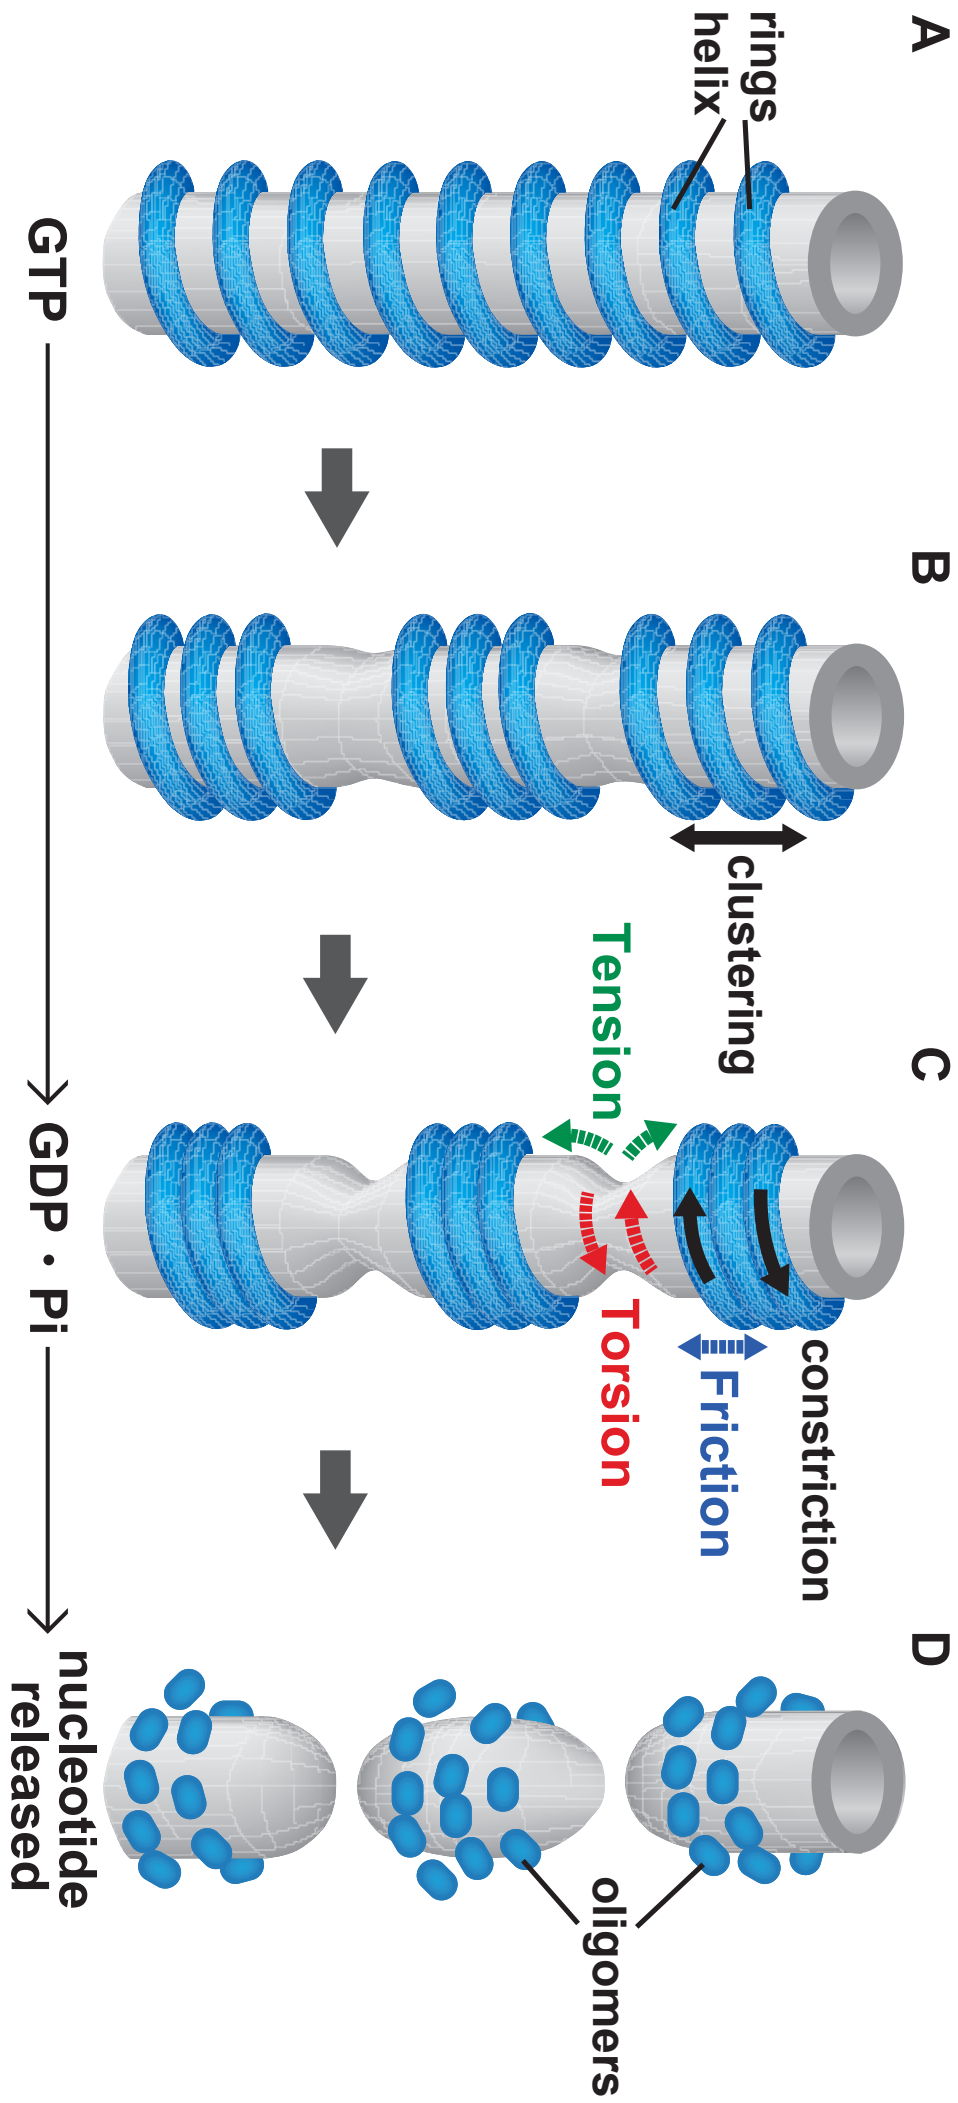

Source: https://www.biorxiv.org/content/10.1101/167262v2.full.pdf
